1 **The human language system, including its inferior frontal component in ‘Broca’s area’,**  
2 **does not support music perception**

3

4 **Authors**

5 Xuanyi Chen<sup>\*1,2,3</sup>, Josef Affourtit<sup>2,3</sup>, Rachel Ryskin<sup>2,3,4</sup>, Tamar I. Regev<sup>2,3</sup>, Samuel  
6 Norman-Haignere<sup>5</sup>, Olessia Jouravlev<sup>2,3,6</sup>, Saima Malik-Moraleda<sup>2,3,7</sup>, Hope Kean<sup>2,3</sup>,  
7 Rosemary Varley<sup>†8</sup>, and Evelina Fedorenko<sup>\*†2,3,7</sup>

8

9 † Co-senior authors

10 \* Corresponding Authors

11 [jchenxy17@gmail.com](mailto:jchenxy17@gmail.com) and [evelina9@mit.edu](mailto:evelina9@mit.edu); 43 Vassar Street, Room 46-

12 3037, Cambridge, MA, 02139

13

14 **Affiliations**

15 <sup>1</sup>Department of Cognitive Sciences, Rice University, TX 77005, USA

16 <sup>2</sup>Department of Brain and Cognitive Sciences, MIT, Cambridge, MA 02139, USA

17 <sup>3</sup>McGovern Institute for Brain Research, MIT, Cambridge, MA 02139, USA

18 <sup>4</sup>Department of Cognitive & Information Sciences, University of California, Merced,  
19 Merced, CA 95343, USA

20 <sup>5</sup>Zuckerman Mind, Brain, Behavior Institute, Columbia University, New York, NY  
21 10027, USA

22 <sup>6</sup>Department of Cognitive Science, Carleton University, Ottawa, Ontario, Canada

- 23           <sup>7</sup>The Program in Speech and Hearing Bioscience and Technology, Harvard University,  
24           Cambridge, MA 02138, USA  
25           <sup>8</sup>Psychology & Language Sciences, UCL, London, WCN1 1PF, UK

26 **Abstract**

27

28 Language and music are two human-unique capacities whose relationship remains debated.  
29 Some have argued for overlap in processing mechanisms, especially for structure processing.  
30 Such claims often concern the inferior frontal component of the language system located within  
31 ‘Broca’s area’. However, others have failed to find overlap. Using a robust individual-subject  
32 fMRI approach, we examined the responses of language brain regions to music stimuli, and  
33 probed the musical abilities of individuals with severe aphasia. Across four experiments, we  
34 obtained a clear answer: music perception does not engage the language system, and judgments  
35 about music structure are possible even in the presence of severe damage to the language  
36 network. In particular, the language regions’ responses to music are generally low, often below  
37 the fixation baseline, and never exceed responses elicited by non-music auditory conditions, like  
38 animal sounds. Further, the language regions are not sensitive to music structure: they show low  
39 responses to intact and structure-scrambled music, and to melodies with vs. without structural  
40 violations. Finally, in line with past patient investigations, individuals with aphasia who cannot  
41 judge sentence grammaticality perform well on melody well-formedness judgments. Thus the  
42 mechanisms that process structure in language do not appear to process music, including music  
43 syntax.

44

45 **Keywords:** language, music, syntactic processing, fMRI, domain specificity

46 **Introduction**

47

48 To interpret language or appreciate music, we must understand how different elements—words  
49 in language, notes and chords in music—relate to each other. Parallels between the structural  
50 properties of language and music have been drawn for over a century (e.g., Riemann 1877, as  
51 cited in Swain 1995; Lindblom and Sundberg 1969; Fay 1971; Boiles 1973; Cooper 1973;  
52 Bernstein 1976; Sundberg and Lindblom 1976; Lerdahl and Jackendoff 1977, 1983; Roads and  
53 Wieneke 1979; Krumhansl and Keil 1982; Baroni et al. 1983; Swain 1995; cf. Jackendoff 2009;  
54 Temperley 2022). However, the question of whether music processing relies on the same  
55 mechanisms as those that support language processing continues to spark debate.

56

57 The empirical landscape is complex. A large number of studies have argued for overlap in  
58 structural processing based on behavioral (e.g., Fedorenko et al. 2009; Slevc et al. 2009; Hoch et  
59 al. 2011; Van de Cavey and Hartsuiker 2016; Kunert et al. 2016), ERP (e.g., Janata 1995; Patel  
60 et al. 1998; Koelsch et al. 2000), MEG (e.g., Maess et al. 2001), fMRI (e.g., Koelsch et al. 2002;  
61 Levitin and Menon 2003; Tillmann et al. 2003; Koelsch 2006; Kunert et al. 2015; Musso et al.  
62 2015), and ECoG (e.g., Sammler et al. 2009, 2013; Rietmolen et al. 2022) evidence (see Tillman  
63 2012; Kunert and Slevc 2015; LaCroix et al. 2016, for reviews). However, we would argue that  
64 no prior study has compellingly established reliance on shared syntactic processing mechanisms  
65 in language and music.

66

67 *First*, evidence from behavioral, ERP, and, to a large extent, MEG studies is indirect because  
68 they do not allow to unambiguously determine where neural responses originate (in ERP and  
69 MEG, this is due to the ‘inverse problem’; Tarantola 2004; Baillet et al. 2014).

70

71 *Second*, the bulk of the evidence comes from structure-violation paradigms. In such paradigms,  
72 responses to the critical condition—which contains an element that violates the rules of tonal  
73 music—are contrasted with responses to the control condition, where stimuli obey the rules of  
74 tonal music. (For language, syntactic violations, like violations of number agreement, are often  
75 used.) Because structural violations (across domains) constitute unexpected events, a brain  
76 region that responds more strongly to the structure-violation condition than the control (no  
77 violation) condition *may* support structure processing in music, but it may also reflect domain-  
78 general processes, like attention or error detection/correction (e.g., Bigand et al. 2001; Poulin-  
79 Charronat et al. 2005; Tillmann et al. 2006; Hoch et al. 2011; Perruchet and Poulin-Charronnat  
80 2013) or low-level sensory effects (e.g., Bigand et al. 2014; Collins et al. 2014; cf. Koelsch et al.  
81 2007). In order to argue that a brain region that shows a *structure-violation* > *no violation* effect  
82 supports structure processing in music, one would need to establish that this brain region i) is  
83 selective for structural violations and does not respond to unexpected non-structural (but  
84 similarly salient) events in music or other domains, and ii) responds to music stimuli even when  
85 no violation is present. This latter point is (surprisingly) not often discussed but is deeply  
86 important: if a brain region supports the processing of music structure, it should be engaged  
87 whenever music is processed (similar to how language areas respond robustly to well-formed  
88 sentences, in addition to showing sensitivity to violated linguistic expectations; e.g., Fedorenko  
89 et al. 2020). After all, in order to detect a structural violation, a brain region needs to process the

90 structure of the preceding context, which implies that it should be working whenever a music  
91 stimulus is present. No previous study has established both of the properties above—selectivity  
92 for structural relative to non-structural violations and robust responses to music stimuli with no  
93 violations—for the brain regions that have been argued to support structure processing in music  
94 (and to overlap with regions that support structure processing in language). In fact, some studies  
95 that have compared unexpected structural and non-structural events in music (e.g., a timbre  
96 change) have reported similar neural responses in fMRI (e.g., Koelsch et al. 2002; cf. some  
97 differences in EEG effects – e.g., Koelsch et al. 2001). Relatedly, and in support of the idea that  
98 effects of music structure violations largely reflect domain-general attentional effects, meta-  
99 analyses of neural responses to unexpected events across domains (e.g., Corbetta and Shulman  
100 2002; Fouragnan et al. 2018; Corlett et al. 2021) have identified regions that grossly resemble  
101 those reported in studies of music structure violations (see Fedorenko and Varley 2016 for  
102 discussion).

103

104 *Third*, most prior fMRI (and MEG) investigations have relied on comparisons of group-level  
105 activation maps. Such analyses suffer from low functional resolution (e.g., Nieto-Castañón and  
106 Fedorenko 2012; Fedorenko 2021), especially in cases where the precise locations of functional  
107 regions vary across individuals, as in the association cortex (Fischl et al. 2008; Frost and Goebel  
108 2012; Tahmasebi et al. 2012; Vazquez-Rodriguez et al. 2019). Thus, observing activation  
109 overlap at the group level does not unequivocally support shared mechanisms. Indeed, studies  
110 that have used individual-subject-level analyses have reported a low or no response to music in  
111 the language-responsive regions (Fedorenko et al. 2011; Rogalsky et al. 2011; Deen et al. 2015).

112

113 *Fourth*, the interpretation of some of the observed effects has relied on the so-called ‘reverse  
114 inference’ (Poldrack 2006, 2011; Fedorenko 2021), where function is inferred from a coarse  
115 anatomical location: for example, some music-structure-related effects observed in or around  
116 ‘Broca’s area’ have been interpreted as reflecting the engagement of linguistic-structure-  
117 processing mechanisms (e.g., Maess et al. 2001; Koelsch et al. 2002) given the long-standing  
118 association between ‘Broca’s area’ and language, including syntactic processing specifically  
119 (e.g., Caramazza and Zurif 1976; Friederici et al. 2006). However, this reasoning is not valid:  
120 Broca’s area is a heterogeneous region, which houses components of at least two functionally  
121 distinct brain networks (Fedorenko et al. 2012; Fedorenko and Blank 2020): the language-  
122 selective network, which responds during language processing, visual or auditory, but does not  
123 respond to diverse non-linguistic stimuli (Fedorenko et al. 2011; Monti et al. 2009, 2012; see  
124 Fedorenko and Varley 2016 for a review) and the domain-general executive control or ‘multiple  
125 demand (MD)’ network, which responds to any demanding cognitive task and is robustly  
126 modulated by task difficulty (Duncan 2010, 2013; Fedorenko et al. 2013; Assem et al. 2020). As  
127 a result, here and more generally, functional interpretation based on coarse anatomical  
128 localization is not justified.

129

130 *Fifth*, many prior fMRI investigations have not reported the magnitudes of response to the  
131 relevant conditions and only examined statistical significance maps for the contrast of interest  
132 (e.g., a whole brain map showing voxels that respond reliably more strongly to melodies with vs.  
133 without a structural violation, and to sentences with vs. without a structural violation). Response  
134 magnitudes of experimental conditions relative to a low-level baseline and to each other are  
135 critical for interpreting a functional profile of a brain region (see e.g., Chen et al. 2017, for

136 discussion). For example, a reliable *violation* > *no violation* effect in music (similar arguments  
137 apply to language) could be observed when both conditions elicit above-baseline responses, and  
138 the violation condition elicits a stronger response (**Figure 1A** left bar graph)—a reasonable  
139 profile for a brain region that supports music processing and is sensitive to the target structural  
140 manipulation. However, a reliable *violation* > *no violation* effect could also be observed when  
141 both conditions elicit below-baseline responses, and the violation condition elicits a less negative  
142 response (**Figure 1A** middle bar graph), or when both conditions elicit low responses—in the  
143 presence of a strong response to stimuli in other domains—and the between-condition difference  
144 is small (**Figure 1A** right bar graph; note that with sufficient power even very small effects can  
145 be highly reliable, but this does not make them theoretically meaningful; e.g., Cumming 2012;  
146 Sullivan and Feinn, 2012). The two latter profiles, where a brain region is more active during  
147 silence than when listening to music, or when the response is overall low and the effect of  
148 interest is minuscule, would be harder to reconcile with a role of this brain region in music  
149 processing (see also the second point above).

150  
151 Similarly, with respect to the music-language overlap question, a reliable *violation* > *no*  
152 *violation* effect for both language and music could be observed in a brain region where sentences  
153 and melodies with violations elicit similarly strong responses, and those without violations elicit  
154 lower responses (**Figure 1B** left bar graph); but it could also arise in a brain region where  
155 sentences with violations elicit a strong response, sentences without violations elicit a lower  
156 response, but melodies elicit an overall low response, with the violation condition eliciting a  
157 higher response than the no-violation condition (**Figure 1B** right bar graph). Whereas in the first  
158 case, it may be reasonable to argue that the brain region in question supports some computation



159 that is necessary to process structure violations in both domains, such interpretation would not be  
160 straightforward in the second case. In particular, given the large main effect of language > music,  
161 any account of possible computations supported by such a brain region would need to explain  
162 this difference instead of simply focusing on the presence of a reliable effect of violation in both  
163 domains. In summary, without examining the magnitudes of response, it is not possible to  
164 distinguish among many, potentially very different, functional profiles, without which  
165 formulating hypotheses about a brain region's computations is precarious.  
166

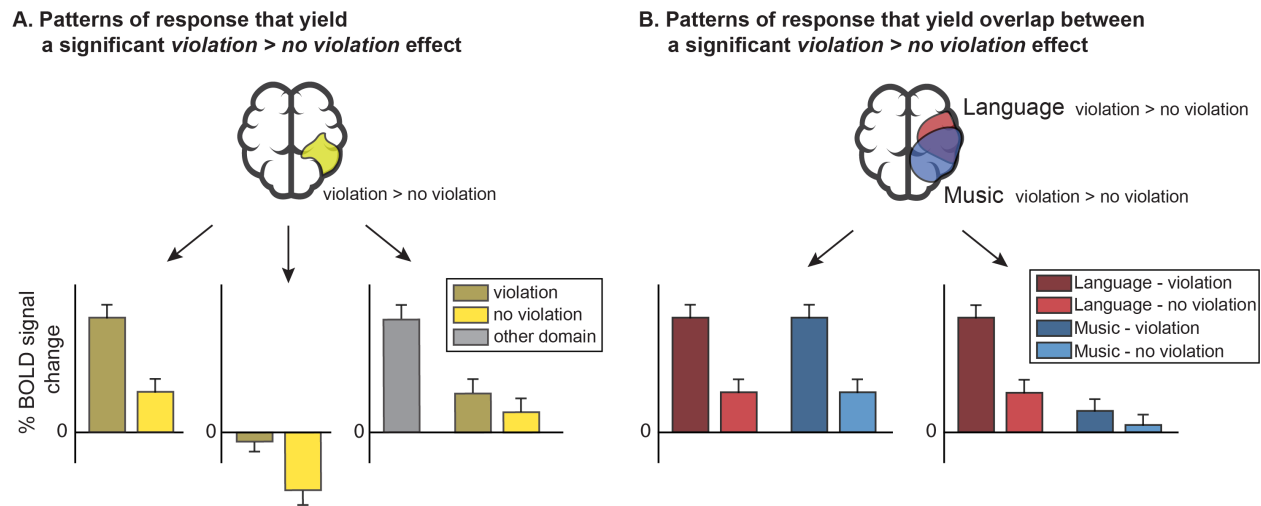

168 **Figure 1:** Illustration of the importance of examining the magnitudes of neural response to the  
169 experimental conditions rather than only the statistical significance maps for the contrast(s) of interest. A  
170 significant *violation > no violation* effect (A) and overlap between a significant *violation > no violation*  
171 effect in language vs. in music (B) are each compatible with multiple distinct functional profiles, only one  
172 of which (on the left in each case) supports the typically proposed interpretation (a region that processes  
173 structure in some domain of interest in A, and a region that processes structure across domains, in both  
174 language and music, in B).  
175

176 Aside from the limitations above, to the best of our knowledge, all prior brain imaging studies  
177 have used a single manipulation in one set of materials and one set of participants. To  
178 compellingly argue that a brain region supports (some aspects of) structural processing in both  
179 language and music, it is important to establish both the *robustness* of the key effect by  
180 replicating it with a new set of experimental materials and/or in a new group of participants, and  
181 its *generalizability* to other contrasts between conditions that engage the hypothesized  
182 computation and ones that do not. For example, to argue that a brain region houses a core  
183 syntactic mechanism needed to process hierarchical relations and/or recursion in both language  
184 and music (e.g., Patel 2003; Fadiga et al. 2009; Roberts 2012; Koelsch et al. 2013; Fitch and  
185 Martins 2014), one would need to demonstrate that this region i) responds robustly to diverse  
186 structured linguistic and musical stimuli (which all invoke the hypothesized shared computation),  
187 ii) shows replicable responses across materials and participants, and iii) is sensitive to more than  
188 a single manipulation targeting the hypothesized computations specifically, as needed to rule out  
189 paradigm-/task-specific accounts (e.g., structured vs. unstructured stimuli, stimuli with vs.  
190 without structural violations, stimuli that are more vs. less structurally complex—e.g., with long-  
191 distance vs. local dependencies, adaptation to structure vs. some other aspect of the stimulus,  
192 etc.).

193  
194 Finally, the neuropsychological patient evidence is at odds with the idea of shared mechanisms  
195 for processing language and music. If language and music relied on the same syntactic  
196 processing mechanism, individuals impaired in their processing of linguistic syntax should also  
197 exhibit impairments in musical syntax. Although some prior studies report subtle musical deficits  
198 in patients with aphasia (Patel et al. 2008a; Sammler et al. 2011), the evidence is equivocal, and

199 many aphasic patients appear to have little or no difficulties with music, including the processing  
200 of music structure (Luria et al. 1965; Brust 1980; Marin 1982; Basso and Capitani 1985; Polk  
201 and Kertesz 1993; Slevc et al. 2016; Faroqi-Shah et al. 2020; Chiapetta et al. 2022; cf. Omigie  
202 and Samson 2014 and Sihvonen et al. 2017 for discussions of evidence that musical training may  
203 lead to better outcomes following brain damage/resection). Similarly, children with Specific  
204 Language Impairment (now called Developmental Language Disorder)—a developmental  
205 disorder that affects several aspects of linguistic and cognitive processing, including syntactic  
206 processing (e.g., Bortolini et al. 1998; Bishop and Norbury 2002)—show no impairments in  
207 musical processing (Fancourt 2013; cf. Jentschke et al. 2008). In an attempt to reconcile the  
208 evidence from acquired and developmental disorders with claims about structure-processing  
209 overlap based on behavioral and neural evidence from neurotypical participants, Patel (2003,  
210 2008, 2012; see Slevc and Okada 2015, Patel and Morgan 2017, and Asano et al. 2021 for  
211 related proposals) put forward a hypothesis whereby the representations that mediate language  
212 and music are stored in distinct brain areas, but the mechanisms that perform online  
213 computations on those representations are partially overlapping. We return to this idea in the  
214 Discussion.

215

216 To bring clarity to this ongoing debate, we conducted three fMRI experiments with neurotypical  
217 adults, and a behavioral study with individuals with severe aphasia. For the fMRI experiments,  
218 we took an approach where we focused on the ‘language network’—a well-characterized set of  
219 left frontal and temporal brain areas that selectively support linguistic processing (e.g.,  
220 Fedorenko et al. 2011) and asked whether any parts of this network show responses to music and  
221 sensitivity to music structure. In each experiment, we used an extensively validated language

222 ‘localizer’ task based on the reading of sentences and nonword sequences (Fedorenko et al.  
223 2010; see Scott et al. 2017 and Malik-Moraleda, Ayyash et al. 2022 for evidence that this  
224 localizer is modality-independent) to identify language-responsive areas in each participant  
225 individually. Importantly, these areas have been shown, across dozens of brain imaging studies,  
226 to be robustly sensitive to linguistic syntactic processing demands in diverse manipulations (e.g.,  
227 Keller et al. 2001; Röder et al. 2002; Friederici 2011; Pallier et al. 2011; Bautista and Wilson  
228 2016, among many others)—including when defined with the same localizer as the one used here  
229 (e.g., Fedorenko et al. 2010, 2012a, 2020; Blank et al. 2016; Mollica et al. 2020; Shain, Blank et  
230 al. 2020; Shain et al. 2022)—and their damage leads to linguistic, including syntactic, deficits  
231 (e.g., Caplan et al. 1996; Dick et al. 2001; Wilson and Saygin 2004; Tyler et al. 2011; Wilson et  
232 al. 2012; Mesulam et al. 2014; Ding et al. 2020; Matchin and Hickok 2020, among many others).  
233 To address the critical research question, we examined the responses of these language areas to  
234 music, and their necessity for processing music structure. In Experiment 1, we included several  
235 types of music stimuli including orchestral music, single-instrument music, synthetic drum  
236 music, and synthetic melodies, a minimal comparison between songs and spoken lyrics, and a set  
237 of non-music auditory control conditions. We additionally examined sensitivity to structure in  
238 music across two structure-scrambling manipulations. In Experiment 2, we further probed  
239 sensitivity to structure in music using the most common manipulation, contrasting responses to  
240 well-formed melodies vs. melodies containing a note that does not obey the constraints of  
241 Western tonal music. And in Experiment 3, we examined the ability to discriminate between  
242 well-formed melodies and melodies containing a structural violation in three profoundly aphasic  
243 individuals across two tasks. Finally, in Experiment 4, we examined the responses of the  
244 language regions to yet another set of music stimuli in a new set of participants. Further, the

245 participants were all native speakers of Mandarin, a tonal language, which allowed us to evaluate  
246 the hypothesis that language regions may play a greater role in music processing in individuals  
247 with higher sensitivity to linguistic pitch (e.g., Deutsch et al. 2006, 2009; Bidelman et al. 2011;  
248 Creel et al. 2018; Ngo et al. 2016; Liu et al. 2021).

249

## 250 **Materials and methods**

251

### 252 *Participants*

253

#### 254 Experiments 1, 2, and 4 (fMRI):

255

256 48 individuals (age 18-51, mean 24.3; 28 female, 20 male) from the Cambridge/Boston, MA  
257 community participated for payment across three fMRI experiments (n=18 in Experiment 1;  
258 n=20 in Experiment 2; n=18 in Experiment 4; 8 participants overlapped between Experiments 1  
259 and 2). 33 participants were right-handed and four left-handed, as determined by the Edinburgh  
260 handedness inventory (Oldfield 1971), or self-report (see Willems et al. 2014, for arguments for  
261 including left-handers in cognitive neuroscience research); the handedness data for the remaining  
262 11 participants (one in Experiment 2 and 10 in Experiment 4) were not collected. All but one  
263 participant (with no handedness information) in Experiment 4 showed typical left-lateralized  
264 language activations in the language localizer task described below (as assessed by numbers of  
265 voxels falling within the language parcels in the left vs. right hemisphere (LH vs. RH), using the  
266 following formula:  $(LH-RH)/(LH+RH)$ ; e.g., Jouravlev et al. 2020; individuals with values of  
267 0.25 or greater were considered to have a left-lateralized language system). For the participant

268 with right-lateralized language activations (with a lateralization value at or below -0.25), we used  
269 right-hemisphere language regions for the analyses (see **SI-3** for analyses where the LH language  
270 regions were used for this participant and when this participant is excluded; the critical results  
271 were not affected). Participants in Experiments 1 and 2 were native English speakers;  
272 participants in Experiment 4 were native Mandarin speakers and proficient speakers of English  
273 (none had any knowledge of Russian, which was used in the unfamiliar foreign-language  
274 condition in Experiment 4). Detailed information on the participants' music background was,  
275 unfortunately, not collected, except for ensuring that the participants were not professional  
276 musicians. All participants gave informed written consent in accordance with the requirements of  
277 MIT's Committee on the Use of Humans as Experimental Subjects (COUHES).

278

279 Experiment 3 (behavioral):

280

281 *Individuals with aphasia.* Three participants with severe and chronic aphasia were recruited to  
282 the study (SA, PR, and PP). All participants gave informed consent in accordance with the  
283 requirements of UCL's Institutional Review Board. Background information on each participant  
284 is presented in **Table 1**. Anatomical scans are shown in **Figure 2A** and extensive perisylvian  
285 damage in the left hemisphere, encompassing areas where language activity is observed in  
286 neurotypical individuals, is illustrated in **Figure 2B**.

287

| Patient | Sex | Age<br>(years) | Time<br>post-<br>onset | Handedness | Etiology | Premorbid<br>musical<br>experience | Premorbid<br>employment |
|---------|-----|----------------|------------------------|------------|----------|------------------------------------|-------------------------|
|---------|-----|----------------|------------------------|------------|----------|------------------------------------|-------------------------|

|    |   | at<br>testing | (years)<br>at<br>testing |   |                              |                                                                                      |                    |
|----|---|---------------|--------------------------|---|------------------------------|--------------------------------------------------------------------------------------|--------------------|
| SA | M | 67            | 21                       | R | Subdural<br>empyema          | Sang in<br>choir; basic<br>sight-<br>reading<br>ability. No<br>formal<br>training.   | Police<br>sergeant |
| PR | M | 68            | 14                       | L | Left<br>hemisphere<br>stroke | Drummer<br>in band;<br>basic sight-<br>reading<br>ability. No<br>formal<br>training. | Retail<br>manager  |
| PP | M | 77            | 10                       | R | Left<br>hemisphere<br>stroke | Childhood<br>musical<br>training (5<br>years). No<br>adult<br>experience.            | Minerals<br>trader |

288 **Table 1.** Background information on the participants with aphasia.

289

### A. Anatomical scans

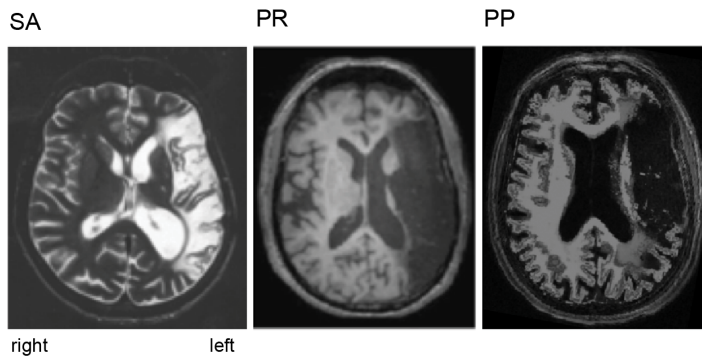

### B. Language network overlay

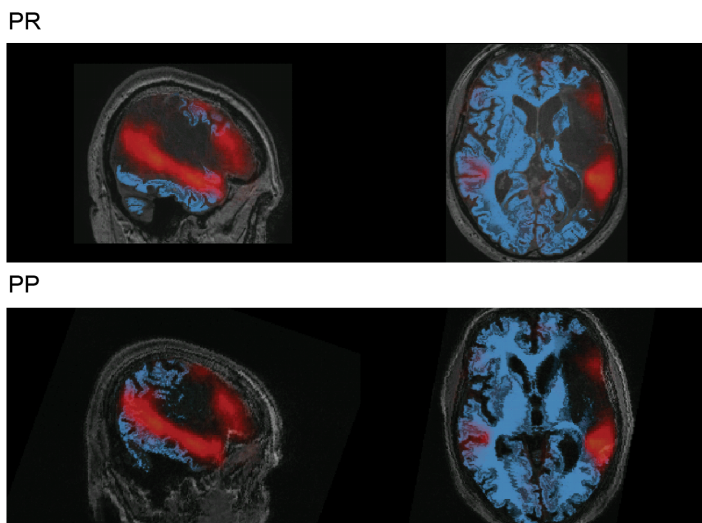

### C. Language tasks

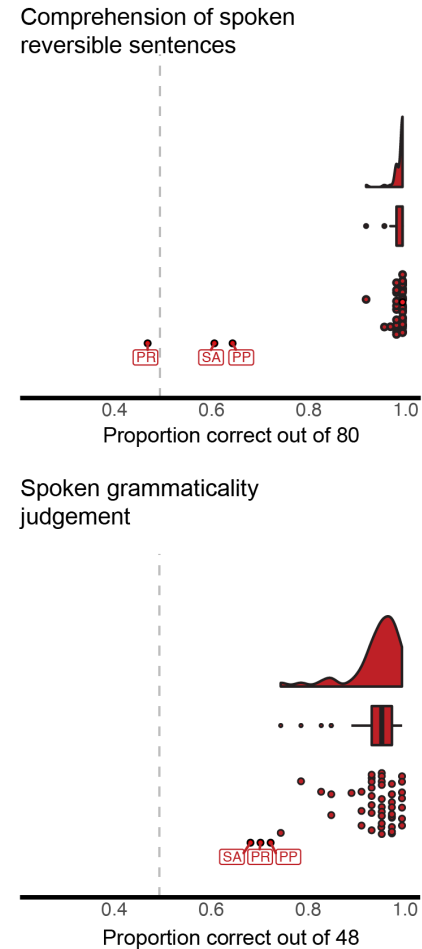

290

291 **Figure 2:** **A.** Anatomical scans (T2-weighted for SA, T1-weighted for PR and PP) of the aphasic  
292 participants (all scans were performed during the chronic phase, as can be seen from the ventricular  
293 enlargement). Note that the right side of the image represents the left side of the brain. **B.** P.R.'s  
294 (top) and P.P.'s (bottom) anatomical scans (blue-tinted) shown with the probabilistic activation  
295 overlap map for the fronto-temporal language network overlaid (SA's raw anatomical data were  
296 not available). The map was created by overlaying thresholded individual activation maps (red-  
297 tinted) for the *sentences* > *nonwords* contrast (Fedorenko et al. 2010) in 220 neurotypical



298 participants (none of whom were participants in any experiments in the current study). As the  
299 images show, the language network falls largely within the lesioned tissue in the left hemisphere.  
300 C. Performance of the control participants and participants with aphasia on two measures of  
301 linguistic syntax processing (see Design, materials, and procedure – Experiment 3): the  
302 comprehension of spoken reversible sentences (top), and the spoken grammaticality judgments  
303 (bottom). The densities show the distribution of proportion correct scores in the control  
304 participants and the boxplot shows the quartiles of the control population (the whiskers show 1.5x  
305 interquartile range and points represent outliers). The dots show individual participants (for the  
306 individuals with aphasia, the initials indicate the specific participant). Dashed grey lines indicate  
307 chance performance.

308

309 *Control participants.* We used Amazon.com’s Mechanical Turk platform to recruit normative  
310 samples for the music tasks and a subset of the language tasks that are most critical to linguistic  
311 syntactic comprehension. Ample evidence now shows that online experiments yield data that  
312 closely mirror the data patterns in experiments conducted in a lab setting (e.g., Crump et al.  
313 2013). Data from participants with IP addresses in the US who self-reported being native English  
314 speakers were included in the analyses. 50 participants performed the critical music task, and the  
315 Scale task from the MBEA (Peretz et al. 2003), as detailed below. Data from participants who  
316 responded incorrectly to the catch trial in the MBEA Scale task (n=5) were excluded from the  
317 analyses, for a final sample of 45 control participants for the music tasks. A separate sample of  
318 50 participants performed the *Comprehension of spoken reversible sentences* task. Data from one  
319 participant who completed fewer than 75% of the questions and another participant who did not  
320 report being a native English speaker were excluded for a final sample of 48 control participants.

321 Finally, a third sample of 50 participants performed the *Spoken grammaticality judgment* task.  
322 Data from one participant who did not report being a native English speaker were excluded for a  
323 final sample of 49 control participants.

324

### 325 *Design, materials, and procedure*

326

#### 327 Experiments 1, 2, and 4 (fMRI):

328

329 Each participant completed a language localizer task (Fedorenko et al. 2010) and one or more of  
330 the critical music perception experiments, along with one or more tasks for unrelated studies.

331 The scanning sessions lasted approximately two hours.

332

333 *Language localizer.* This task is described in detail in Fedorenko et al. (2010) and subsequent  
334 studies from the Fedorenko lab (e.g., Fedorenko et al. 2011; Blank et al. 2014; Blank et al. 2016;  
335 Pritchett et al. 2018; Paunov et al. 2019; Fedorenko et al. 2020; Shain, Blank et al. 2020, among  
336 others) and is available for download from <https://evlab.mit.edu/funcloc/>). Briefly, participants  
337 read sentences and lists of unconnected, pronounceable nonwords in a blocked design. Stimuli  
338 were presented one word/nonword at a time at the rate of 450ms per word/nonword. Participants  
339 read the materials passively and performed a simple button-press task at the end of each trial  
340 (included in order to help participants remain alert). Each participant completed two ~6-minute  
341 runs. This localizer task has been extensively validated and shown to be robust to changes in the  
342 materials, modality of presentation (visual vs. auditory), and task (e.g., Fedorenko et al. 2010;  
343 Fedorenko 2014; Scott et al. 2017; Diachek, Blank, Siegelman et al. 2020; Malik-Moraleda,

344 Ayyash et al. 2022; Lipkin et al. 2022; see the results of Experiments 1 and 4 for additional  
345 replications of modality robustness). Further, a network that corresponds closely to the localizer  
346 contrast (*sentences* > *nonwords*) emerges robustly from whole-brain task-free data—voxel  
347 fluctuations during rest (e.g., Braga et al. 2020; see Braga 2021 for a general discussion of how  
348 well-validated localizers tend to show tight correspondence with intrinsic networks recovered in  
349 a data-driven way). The fact that different regions of the language network show strong  
350 correlations in their activity during naturalistic cognition (see also Blank et al. 2014; Paunov et  
351 al. 2019; Malik-Moraleda, Ayyash et al. 2022) provides support for the idea that this network  
352 constitutes a ‘natural kind’ in the brain (a subset of the brain that is strongly internally integrated  
353 and robustly dissociable from the rest of the brain) and thus a meaningful unit of analysis.  
354 However, we also examine individual regions of this network, to paint a more complete picture,  
355 given that many past claims about language-music overlap have concerned the inferior frontal  
356 component of the language network.

357  
358 *Experiment 1.* Participants passively listened to diverse stimuli across 18 conditions in a long-  
359 event-related design. The materials for this and all other experiments are available at OSF:  
360 <https://osf.io/68y7c/>. All stimuli were 9 s in length. The conditions were selected to probe  
361 responses to music, to examine sensitivity to structure scrambling in music, to compare  
362 responses to songs vs. spoken lyrics, and to compare responses to music stimuli vs. other  
363 auditory stimuli.

364  
365 The four non-vocal music conditions (all Western tonal music) included orchestral music, single-  
366 instrument music, synthetic drum music, and synthetic melodies (see **SI-5** for a summary of the

367 acoustic properties of these and other conditions, as quantified with the MIR toolbox; Lartillot  
368 and Toiviainen 2007; Lartillot and Grandjean 2019). The orchestral music condition consisted of  
369 12 stimuli (**SI-Table 4a**) selected from classical orchestras or jazz bands. The single-instrument  
370 music condition consisted of 12 stimuli (**SI-Table 4b**) that were played on one of the following  
371 instruments: cello (n=1), flute (n=1), guitar (n=4), piano (n=4), sax (n=1), or violin (n=1). The  
372 synthetic drum music condition consisted of 12 stimuli synthesized using percussion patches  
373 from MIDI files taken from freely available online collections. The stimuli were synthesized  
374 using the MIDI toolbox for MATLAB (writemidi). The synthetic melodies condition consisted  
375 of 12 stimuli transcribed from folk tunes obtained from freely available online collections. Each  
376 melody was defined by a sequence of notes with corresponding pitches and durations. Each note  
377 was composed of harmonics 1 through 10 of the fundamental presented in equal amplitude, with  
378 no gap in-between notes. Phase discontinuities between notes were avoided by ensuring that the  
379 starting phase of the next note was equal to the ending phase of the previous note.

380  
381 The synthetic drum music and the synthetic melodies conditions had scrambled counterparts to  
382 probe sensitivity to music structure. This intact > scrambled contrast has been used in some past  
383 studies of structure processing in music (e.g., Levitin and Menon 2003) and is parallel to the  
384 sentences > word-list contrast in language, which has been often used to probe sensitivity for  
385 combinatorial processing (e.g., Fedorenko et al. 2010). The scrambled drum music condition was  
386 created by jittering the inter-note-interval (INI). The amount of jitter was sampled from a  
387 uniform distribution (from -0.5 to 0.5 beats). The scrambled INIs were truncated to be no smaller  
388 than 5% of the distribution of INIs from the intact drum track. The total distribution of INIs was  
389 then scaled up or down to ensure that the total duration remained unchanged. The scrambled

390 melodies condition was created by scrambling both pitch and rhythm information. Pitch  
391 information was scrambled by randomly re-ordering the sequence of pitches and then adding  
392 jitter to disrupt the key. The amount of jitter for each note was sampled from a uniform  
393 distribution centered on the note's pitch after shuffling (from -3 to +3 semitones). The duration of  
394 each note was also jittered (from -0.2 to 0.2 beats). To ensure the total duration was unaffected  
395 by jitter,  $N/2$  positive jitter values were sampled, where  $N$  is the number of notes, and then a  
396 negative jitter was added with the same magnitude for each of the positive samples, such that the  
397 sum of all jitters equaled 0. To ensure the duration of each note remained positive, the smallest  
398 jitters were added to the notes with the smallest durations. Specifically, the note durations and  
399 sampled jitters were sorted by their magnitude, summed, and then the jittered durations were  
400 randomly re-ordered.

401  
402 To allow for a direct comparison between music and linguistic conditions within the same  
403 experiment, we included auditory sentences and auditory nonword sequences. The sentence  
404 condition consisted of 24 lab-constructed stimuli (half recorded by a male, and half by a female).  
405 Each stimulus consisted of a short story (each three sentences long) describing common,  
406 everyday events. Any given participant heard 12 of the stimuli (6 male, 6 female). The nonword  
407 sequence condition consisted of 12 stimuli (recorded by a male).

408  
409 We also included two other linguistic conditions: songs and spoken lyrics. These conditions were  
410 included to test whether the addition of a melodic contour to speech (in songs) would increase  
411 the responses of the language regions. Such a pattern might be expected of a brain region that  
412 responds to both linguistic content and music structure. The songs and the lyrics conditions each

413 consisted of 24 stimuli. We selected songs with a tune that was easy to sing without  
414 accompaniment. These materials were recorded by four male singers: each recorded between 2  
415 and 11 song-lyrics pairs. The singers were actively performing musicians (e.g., in *a cappella*  
416 groups) but were not professionals. Any given participant heard either the song or the lyrics  
417 version of an item for 12 stimuli in each condition.

418

419 Finally, to assess the specificity of potential responses to music, we included three non-music  
420 conditions: animal sounds and two kinds of environmental sounds (pitched and unpitched),  
421 which all share some low-level acoustic properties with music (see SI-5). The animal sounds  
422 condition and the environmental sounds conditions each consisted of 12 stimuli taken from in-  
423 lab collections. If individual recordings were shorter than 9 s, then several recordings of the same  
424 type of sound were concatenated together (100 ms gap in between). We included the pitch  
425 manipulation in order to test for general responsiveness to pitch—a key component of music—in  
426 the language regions.

427

428 (The remaining five conditions were not directly relevant to the current study or redundant with  
429 other conditions for our research questions and therefore not included in the analyses. These  
430 included three distorted speech conditions—lowpass-filtered speech, speech with a flattened  
431 pitch contour, and lowpass-filtered speech with a flattened pitch contour—and two additional  
432 low-level controls for the synthetic melody stimuli. The speech conditions were included to  
433 probe sensitivity to linguistic prosody for an unrelated study. The additional synthetic music  
434 control conditions were included to allow for a more rigorous interpretation of the intact >  
435 scrambled synthetic melodies effect had we observed such an effect. For completeness, on the

436 OSF page, <https://osf.io/68y7c/>, we provide a data table that includes responses to these five  
437 conditions.)

438

439 For each participant, stimuli were randomly divided into six sets (corresponding to runs) with  
440 each set containing two stimuli from each condition. The order of the conditions for each run  
441 was selected from four predefined palindromic orders, which were constructed so that conditions  
442 targeting similar mental processes (e.g., orchestral music and single-instrument music) were  
443 separated by other conditions (e.g., speech or animal sounds). Each run contained three 10 s  
444 fixation periods: at the beginning, in the middle, and at the end. Otherwise, the stimuli were  
445 separated by 3 s fixation periods, for a total run duration of 456 s (7 min 36 s). All but two of the  
446 18 participants completed all six runs (and thus got a total of 12 experimental events per  
447 condition); the remaining two completed four runs (and thus got 8 events per condition).

448

449 Because, as noted above, we have previously established that the language localizer is robust to  
450 presentation modality, we used the visual localizer to define the language regions. However, in SI-  
451 2 we show that the critical results are similar when auditory contrasts (*sentences* > *nonwords* in  
452 Experiment 1, or *Mandarin sentences* > *foreign* in Experiment 4) are instead used to define the  
453 language regions.

454

455 *Experiment 2*. Participants listened to well-formed melodies (adapted and expanded from  
456 Fedorenko et al. 2009) and melodies with a structural violation in a long-event-related design and  
457 judged the well-formedness of the melodies. As discussed in the Introduction, this type of  
458 manipulation is commonly used to probe sensitivity to music structure, including in studies

459 examining language-music overlap (e.g., Patel et al. 1998; Koelsch et al. 2000, 2002; Maess et al.  
460 2001; Tillmann et al. 2003; Fedorenko et al. 2009; Slevc et al. 2009; Kunert et al. 2015; Musso et  
461 al. 2015). The melodies were between 11 and 14 notes. The well-formed condition consisted of 90  
462 melodies, which were tonal and ended in a tonic note with an authentic cadence in the implied  
463 harmony. All melodies were isochronous, consisting of quarter notes except for the final half note.  
464 The first five notes established a strong sense of key. Each melody was then altered to create a  
465 version with a “sour” note: the pitch of one note (from among the last four notes in a melody) was  
466 altered up or down by one or two semitones, so as to result in a non-diatonic note while keeping  
467 the melodic contour (the up-down pattern) the same. The structural position of the note that  
468 underwent this change varied among the tonic, the fifth, and the major third. The full set of 180  
469 melodies was distributed across two lists following a Latin Square design. Any given participant  
470 heard stimuli from one list.

471

472 For each participant, stimuli were randomly divided into two sets (corresponding to runs) with  
473 each set containing 45 melodies (22 or 23 per condition). The order of the conditions, and the  
474 distribution of inter-trial fixation periods, was determined by the optseq2 algorithm (Dale et al.  
475 1999). The order was selected from among four predefined orders, with no more than four trials  
476 of the same condition in a row. In each trial, participants were presented with a melody for three  
477 seconds followed by a question, presented visually on the screen, about the well-formedness of the  
478 melody (“Is the melody well-formed?”). To respond, participants had to press one of two buttons  
479 on a button box within two seconds. When participants answered, the question was replaced by a  
480 blank screen for the remainder of the two-second window; if no response was made within the  
481 two-second window, the experiment advanced to the next trial. Responses received within one



482 second after the end of the previous trial were still recorded to account for the possible slow  
483 responses. The screen was blank during the presentation of the melodies. Each run contained 151  
484 s of fixation interleaved among the trials, for a total run duration of 376 s (6 min 16 s). Fourteen  
485 of the 20 participants completed both runs, four participants completed one run, and the two  
486 remaining participants completed two runs but we only included their first run because, due to  
487 experimenter error, the second run came from a different experimental list and thus included some  
488 of the melodies from the first run in the other condition (the data pattern was qualitatively and  
489 quantitatively the same if both runs were included for these participants). Finally, due to a script  
490 error, participants only heard the first 12 notes of each melody during the three seconds of stimulus  
491 presentation. Therefore, we only analyzed the 80 of the 90 pairs (160 of the 180 total melodies)  
492 where the contrastive note appeared within the first 12 notes.

493

494 *Experiment 4.* Participants passively listened to single-instrument music, environmental sounds,  
495 sentences in their native language (Mandarin), and sentences in an unfamiliar foreign language  
496 (Russian) in a blocked design. All stimuli were 5-5.95s in length. The conditions were selected to  
497 probe responses to music, and to compare responses to music stimuli vs. other auditory stimuli.  
498 The critical music condition consisted of 60 stimuli selected from classical pieces by J.S. Bach  
499 played on cello, flute, or violin (n=15 each) and jazz music played on saxophone (n=15). The  
500 environmental sounds condition consisted of 60 stimuli selected from in-lab collections and  
501 included both pitched and unpitched stimuli. The foreign language condition consisted of 60  
502 stimuli selected from Russian audiobooks (short stories by Paustovsky and “Fathers and Sons” by  
503 Turgenev). The foreign language condition was included because creating a ‘nonwords’ condition  
504 (the baseline condition we typically use for defining the language regions; Fedorenko et al. 2010)

505 is challenging in Mandarin given that most words are monosyllabic, thus most syllables carry some  
506 meaning. As a result, sequences of syllables are more akin to lists of words. Therefore, we included  
507 the unfamiliar foreign language condition, which also works well as a baseline for language  
508 processing (Malik-Moraleda, Ayyash et al. 2022). The Mandarin sentence condition consisted of  
509 120 lab-constructed sentences, each recorded by a male and a female native speaker. (The  
510 experiment also included five conditions that were not relevant to the current study and therefore  
511 not included in the analyses. These included three conditions probing responses to the participants'  
512 second language (English) and two control conditions for Mandarin sentences. For completeness,  
513 on the OSF page, <https://osf.io/68y7c/>, we provide a data table that includes responses to these five  
514 conditions.)

515

516 Stimuli were grouped into blocks with each block consisting of three stimuli and lasting 18s  
517 (stimuli were padded with silence to make each trial exactly six seconds long). For each participant,  
518 blocks were divided into 10 sets (corresponding to runs), with each set containing two blocks from  
519 each condition. The order of the conditions for each run was selected from eight predefined  
520 palindromic orders. Each run contained three 14 s fixation periods: at the beginning, in the middle,  
521 and at the end, for a total run duration of 366 s (6 min 6 s). Five participants completed eight of  
522 the 10 runs (and thus got 16 blocks per condition; the remaining thirteen completed six runs (and  
523 thus got 12 blocks per condition). (We had created enough materials for 10 runs, but based on  
524 observing robust effects for several key contrasts in the first few participants who completed six  
525 to eight runs, we administered 6-8 runs to the remaining participants.)

526

527 Because we have previously found that an English localizer works well in native speakers of  
528 diverse languages, including Mandarin, as long as they are proficient in English (Malik-Moraleda,  
529 Ayyash et al. 2022), we used the same localizer in Experiment 4 as the one used in Experiments 1  
530 and 2, for consistency. However, in SI-2 (**SI-Figure 2c**, **SI-Table 2c**) we show that the critical  
531 results are similar when the *Mandarin sentences* > *foreign* contrast is instead used to define the  
532 language regions.

533

534 Experiment 3 (behavioral):

535

536 *Language assessments.* Participants with aphasia were assessed for the integrity of lexical  
537 processing using word-to-picture matching tasks in both spoken and written modalities (ADA  
538 Spoken and Written Word-Picture Matching; Franklin et al. 1992). Productive vocabulary was  
539 assessed through picture naming. In the spoken modality, the Boston Naming Test was employed  
540 (Kaplan et al. 2001), and in writing, the PALPA Written Picture Naming subtest (Kay et al.  
541 1992). Sentence processing was evaluated in both spoken and written modalities through  
542 comprehension (sentence-to-picture matching) of reversible sentences in active and passive  
543 voice. In a reversible sentence, the heads of both noun phrases are plausible agents, and  
544 therefore, word order, function words, and functional morphology are the only cues to who is  
545 doing what to whom. Participants also completed spoken and written grammaticality judgment  
546 tasks, where they made a yes/no decision as to the grammaticality of a word string. The task  
547 employed a subset of sentences from Linebarger et al. (1983).

548

549 All three participants exhibited severe language impairments that disrupted both comprehension  
 550 and production (**Table 2**). For lexical-semantic tasks, all three participants displayed residual  
 551 comprehension ability for high imageability/picturable vocabulary, although more difficulty was  
 552 evident on the synonym matching test, which included abstract words. They were all severely  
 553 anomic in speech and writing. Sentence production was severely impaired with output limited to  
 554 single words, social speech (expressions, like “How are you?”), and other formulaic expressions  
 555 (e.g., “and so forth”). Critically, all three performed at or close to chance level on spoken and  
 556 written comprehension of reversible sentences and grammaticality judgments; each patient’s  
 557 scores were lower than all of the healthy controls (**Table 2** and **Figure 2C**).  
 558

| Participant                                                             | SA      | PR      | PP      | Controls |
|-------------------------------------------------------------------------|---------|---------|---------|----------|
| <b>Lexical-semantic assessments</b>                                     |         |         |         |          |
| ADA Spoken Word-Picture Matching<br>(chance = 16.5)                     | 60/66   | 61/66   | 64/66   | N/A      |
| ADA Written Word-Picture Matching<br>(chance = 16.5)                    | 62/66   | 66/66   | 58/66   | N/A      |
| ADA spoken synonym matching (chance = 80)                               | 123/160 | 121/160 | 135/160 | N/A      |
| ADA written synonym matching (chance = 80)                              | 121/160 | 145/160 | 143/160 | N/A      |
| Boston Naming Test<br>(NB: accepting both spoken and written responses) | 4/60    | 4/60    | 11/60   | N/A      |

|                                                             |       |       |       |                                                                      |
|-------------------------------------------------------------|-------|-------|-------|----------------------------------------------------------------------|
| PALPA 54 Written Picture Naming                             | 24/60 | 2/60  | 1/60  | N/A                                                                  |
| <b>Syntactic assessments</b>                                |       |       |       |                                                                      |
| Comprehension of spoken reversible sentences (chance = 40)  | 49/80 | 38/80 | 52/80 | Mean =<br>79.5/80<br>SD = 1.03<br>Min = 74/80<br>Max = 80/80<br>N=48 |
| Comprehension of written reversible sentences (chance = 40) | 42/80 | 49/80 | 51/80 | N/A                                                                  |
| Spoken grammaticality judgments (chance = 24)               | 33/48 | 34/48 | 35/48 | Mean =<br>45.5/48<br>SD = 2.52<br>Min = 36/48<br>Max = 48/48<br>N=49 |
| Written grammaticality judgments (chance = 24)              | 29/48 | 24/48 | 29/48 | N/A                                                                  |

559 **Table 2.** Results of language assessments for participants with aphasia and healthy controls. For

560 each test, we show number of correctly answered questions out of the total number of questions.

561

562 *Critical music task.* Participants judged the well-formedness of the melodies from Experiment 2.

563 Judgments were intended to reflect the detection of the key violation in the sour versions of the

564 melodies. The full set of 180 melodies was distributed across two lists following a Latin Square  
565 design. All participants heard all 180 melodies. The control participants heard the melodies from  
566 one list, followed by the melodies from the other list, with the order of lists counter-balanced  
567 across participants. For the participants with aphasia, each list was further divided in half, and  
568 each participant was tested across four sessions, with 45 melodies per session, to minimize  
569 fatigue.

570

571 *Montreal Battery for the Evaluation of Amusia*. To obtain another measure of music  
572 competence/sensitivity to music structure, we administered the Montreal Battery for the  
573 Evaluation of Amusia (MBEA) (Peretz et al. 2003). The battery consists of six tasks that assess  
574 musical processing components described by Peretz and Coltheart (2003): three target melodic  
575 processing, two target rhythmic processing, and one assesses memory for melodies. Each task  
576 consists of 30 experimental trials (and uses the same set of 30 base melodies) and is preceded by  
577 practice examples. Some of the tasks additionally include a catch trial, as described below. For  
578 the purposes of the current investigation, the critical task is the “Scale” task. Participants are  
579 presented with pairs of melodies that they have to judge as identical or not. On half of the trials,  
580 one of the melodies is altered by modifying the pitch of one of the tones to be out of scale. Like  
581 our critical music task, this task aims to test participants’ ability to represent and use tonal  
582 structure in Western music, except that instead of making judgments on each individual melody,  
583 participants compare two melodies on each trial. This task thus serves as a conceptual replication  
584 (Schmidt 2009). One trial contains stimuli designed to be easy, intended as a catch trial to ensure  
585 that participants are paying attention. In this trial, the comparison melody has all its pitches set at  
586 random. This trial is excluded when computing the scores.

587

588 Control participants performed just the Scale task. Participants with aphasia performed all six  
589 tasks, distributed across three testing sessions to minimize fatigue.

590

591 *fMRI data acquisition, preprocessing, and first-level modeling (for Experiments 1, 2, and 4)*

592

593 *Data acquisition.* Whole-brain structural and functional data were collected on a whole-body 3  
594 Tesla Siemens Trio scanner with a 32-channel head coil at the Athinoula A. Martinos Imaging  
595 Center at the McGovern Institute for Brain Research at MIT. T1-weighted structural images were  
596 collected in 176 axial slices with 1 mm isotropic voxels (repetition time (TR) = 2,530 ms; echo  
597 time (TE) = 3.48 ms). Functional, blood oxygenation level-dependent (BOLD) data were  
598 acquired using an EPI sequence with a 90° flip angle and using GRAPPA with an acceleration  
599 factor of 2; the following parameters were used: thirty-one 4.4 mm thick near-axial slices  
600 acquired in an interleaved order (with 10% distance factor), with an in-plane resolution of 2.1  
601 mm × 2.1 mm, FoV in the phase encoding (A >> P) direction 200 mm and matrix size 96 × 96  
602 voxels, TR = 2000 ms and TE = 30 ms. The first 10 s of each run were excluded to allow for  
603 steady state magnetization (see OSF <https://osf.io/68y7c/> for the pdf of the scanning protocols).  
604 (Note that we opted to use a regular, continuous, scanning sequence in spite of investigating  
605 responses to auditory conditions. However, effects of scanner noise are unlikely to be  
606 detrimental given that all the stimuli are clearly perceptible, as also confirmed by examining  
607 responses in the auditory areas.)

608

609 *Preprocessing.* fMRI data were analyzed using SPM12 (release 7487), CONN EvLab module  
610 (release 19b), and other custom MATLAB scripts. Each participant's functional and structural  
611 data were converted from DICOM to NIFTI format. All functional scans were coregistered and  
612 resampled using B-spline interpolation to the first scan of the first session (Friston et al. 1995).  
613 Potential outlier scans were identified from the resulting subject-motion estimates as well as  
614 from BOLD signal indicators using default thresholds in CONN preprocessing pipeline (5  
615 standard deviations above the mean in global BOLD signal change, or framewise displacement  
616 values above 0.9 mm; Nieto-Castañón 2020). Functional and structural data were independently  
617 normalized into a common space (the Montreal Neurological Institute [MNI] template;  
618 IXI549Space) using SPM12 unified segmentation and normalization procedure (Ashburner and  
619 Friston 2005) with a reference functional image computed as the mean functional data after  
620 realignment across all timepoints omitting outlier scans. The output data were resampled to a  
621 common bounding box between MNI-space coordinates (-90, -126, -72) and (90, 90, 108), using  
622 2mm isotropic voxels and 4th order spline interpolation for the functional data, and 1mm  
623 isotropic voxels and trilinear interpolation for the structural data. Last, the functional data were  
624 smoothed spatially using spatial convolution with a 4 mm FWHM Gaussian kernel.

625

626 *First-level modeling.* For both the language localizer task and the critical experiments, effects  
627 were estimated using a General Linear Model (GLM) in which each experimental condition was  
628 modeled with a boxcar function convolved with the canonical hemodynamic response function  
629 (HRF) (fixation was modeled implicitly, such that all timepoints that did not correspond to one  
630 of the conditions were assumed to correspond to a fixation period). Temporal autocorrelations in  
631 the BOLD signal timeseries were accounted for by a combination of high-pass filtering with a



632 128 seconds cutoff, and whitening using an AR(0.2) model (first-order autoregressive model  
633 linearized around the coefficient  $a=0.2$ ) to approximate the observed covariance of the functional  
634 data in the context of Restricted Maximum Likelihood estimation (ReML). In addition to  
635 experimental condition effects, the GLM design included first-order temporal derivatives for  
636 each condition (included to model variability in the HRF delays), as well as nuisance regressors  
637 to control for the effect of slow linear drifts, subject-motion parameters, and potential outlier  
638 scans on the BOLD signal.

639

#### 640 *Definition of the language functional regions of interest (fROIs) (for Experiments 1, 2, and 4)*

641

642 For each critical experiment, we defined a set of language functional regions of interest (fROIs)  
643 using group-constrained, subject-specific localization (Fedorenko et al. 2010). In particular, each  
644 individual map for the *sentences* > *nonwords* contrast from the language localizer was  
645 intersected with a set of five binary masks. These masks (**Figure 3**; available at OSF:  
646 <https://osf.io/68y7c/>) were derived from a probabilistic activation overlap map for the same  
647 contrast in a large independent set of participants (n=220) using watershed parcellation, as  
648 described in Fedorenko et al. (2010) for a smaller set of participants. These masks covered the  
649 fronto-temporal language network in the left hemisphere. Within each mask, a participant-  
650 specific language fROI was defined as the top 10% of voxels with the highest *t*-values for the  
651 localizer contrast.

652

#### 653 *Validation of the language fROIs*

654

655 To ensure that the language fROIs behave as expected (i.e., show a reliably greater response to  
656 the sentences condition compared to the nonwords condition), we used an across-runs cross-  
657 validation procedure (e.g., Nieto-Castañón and Fedorenko 2012). In this analysis, the first run of  
658 the localizer was used to define the fROIs, and the second run to estimate the responses (in  
659 percent BOLD signal change, PSC) to the localizer conditions, ensuring independence (e.g.,  
660 Kriegeskorte et al. 2009); then the second run was used to define the fROIs, and the first run to  
661 estimate the responses; finally, the extracted magnitudes were averaged across the two runs to  
662 derive a single response magnitude for each of the localizer conditions. Statistical analyses were  
663 performed on these extracted PSC values. Consistent with much previous work (e.g., Fedorenko  
664 et al. 2010; Mahowald and Fedorenko 2016; Diachek, Blank, Siegelman et al. 2020), each of the  
665 language fROIs showed a robust *sentences* > *nonwords* effect (all *ps* < 0.001).

666

### 667 **Statistical analyses for the fMRI experiments**

668

669 All analyses were performed with linear mixed-effects models using the “lme4” package in R  
670 with *p*-value approximation performed by the “lmerTest” package (Bates et al. 2015; Kuznetsova  
671 et al. 2017). Effect size (Cohen’s *d*) was calculated using the method from Westfall et al. (2014)  
672 and Brysbaert and Stevens (2018).

673

### 674 ***Sanity check analyses and results***

675

676 To estimate the responses in the language fROIs to the conditions of the critical experiments here  
677 and in the critical analyses, the data from all the runs of the language localizer were used to

678 define the fROIs, and the responses to each condition were then estimated in these regions.  
679 Statistical analyses were then performed on these extracted PSC values. (For Experiments 1 and  
680 4, we repeated the analyses using alternative language localizer contrasts to define the language  
681 fROIs (auditory *sentences* > *nonwords* in Experiment 1, and *Mandarin sentences* > *foreign* in  
682 Experiment 4), which yielded quantitatively and qualitatively similar responses (see **SI-2**.)  
683  
684 We conducted two sets of sanity check analyses. First, to ensure that auditory conditions that  
685 contain meaningful linguistic content elicit strong responses in the language regions relative to  
686 perceptually similar conditions with no discernible linguistic content, we compared the auditory  
687 sentences condition with the auditory nonwords condition (Experiment 1) or with the foreign  
688 language condition (Experiment 4). Indeed, as expected, the auditory sentence condition elicited  
689 a stronger response than the auditory nonwords condition (Experiment 1) or the foreign language  
690 condition (Experiment 4). These effects were robust at the network level ( $ps < 0.001$ ; **SI-Table**  
691 **1a**). Further, the *sentences* > *nonwords* effect was significant in all but one language fROI in  
692 Experiment 1, and the *sentences* > *foreign* effect was significant in all language fROIs in  
693 Experiment 4 ( $ps < 0.05$ ; **SI-Table 1a**).  
694  
695 And second, to ensure that the music conditions elicit strong responses in auditory cortex, we  
696 extracted the responses from a bilateral anatomically defined auditory cortical region (area Te1.2  
697 from the Morosan et al. 2001 cytoarchitectonic probabilistic atlas) to the six critical music  
698 conditions: orchestral music, single instrument music, synthetic drum music, and synthetic  
699 melodies in Experiment 1; well-formed melodies in Experiment 2; and the music condition in  
700 Experiment 4. Statistical analyses, comparing each condition to the fixation baseline, were

701 performed on these extracted PSC values. As expected, all music conditions elicited strong  
702 responses in a primary auditory area bilaterally (all  $ps \approx 0.001$ ; **SI-Table 1b**; **SI-Figure 1**).

703

#### 704 *Critical analyses*

705

706 To characterize the responses in the language network to music perception, we asked three  
707 questions. First, we asked whether music conditions elicit strong responses in the language  
708 regions. Second, we investigated whether the language network is sensitive to structure in music,  
709 as would be evidenced by stronger responses to intact than scrambled music, and stronger  
710 responses to melodies with structural violations compared to the no-violation control condition.

711 And third, we asked whether music conditions elicit strong responses in the language regions of  
712 individuals with high sensitivity to linguistic pitch—native speakers of a tonal language  
713 (Mandarin).

714

715 For each contrast (the contrasts relevant to the three research questions are detailed below), we  
716 used two types of linear mixed-effect regression models:

- 717 i) the language network model, which examined the language network as a whole; and
- 718 ii) the individual language fROI models, which examined each language fROI separately.

719

720 As alluded to in the Introduction, treating the language network as an integrated system is  
721 reasonable given that the regions of this network a) show similar functional profiles, both with  
722 respect to selectivity for language over non-linguistic processes (e.g., Fedorenko et al. 2011;  
723 Pritchett et al. 2018; Jouravlev et al. 2019; Ivanova et al. 2020, 2021) and with respect to their

724 role in lexico-semantic and syntactic processing (e.g., Fedorenko et al. 2012b; Blank et al. 2016;  
725 Fedorenko et al. 2020); and b) exhibit strong inter-region correlations in both their activity  
726 during naturalistic cognition paradigms (e.g., Blank et al. 2014; Braga et al. 2020; Paunov et al.  
727 2019; Malik-Moraleda, Ayyash et al. 2022) and key functional markers, like the strength or  
728 extent of activation in response to language stimuli (e.g., Mahowald and Fedorenko 2016;  
729 Mineroff, Blank et al. 2018). However, to allow for the possibility that language regions differ in  
730 their response to music and to examine the region on which most claims about language-music  
731 overlap have focused (the region that falls within ‘Broca’s area’), we supplement the network-  
732 wise analyses with the analyses of the five language fROIs separately.

733

734 For each network-wise analysis, we fit a linear mixed-effect regression model predicting the  
735 level of BOLD response in the language fROIs in the contrasted conditions. The model included  
736 a fixed effect for condition (the relevant contrasts are detailed below for each analysis) and  
737 random intercepts for fROIs and participants. Here and elsewhere, the  $p$ -value was estimated by  
738 applying the Satterthwaite's method-of-moment approximation to obtain the degrees of freedom  
739 (Giesbrecht and Burns 1985; Fai and Cornelius 1996; as described in Kuznetsova et al. 2017).

740 For the comparison against the fixation baseline, the random intercept for participants was  
741 removed because it is no longer applicable.

742

743 
$$\text{Effect size} \sim \text{condition} + (1 | \text{fROI}) + (1 | \text{Participant})$$

744

745 For each fROI-wise analysis, we fit a linear mixed-effect regression model predicting the level of  
746 BOLD response in each of the five language fROIs in the contrasted conditions. The model

747 included a fixed effect for condition and random intercepts for participants. For each analysis,  
748 the results were FDR-corrected for the five fROIs. For the comparison against the fixation  
749 baseline, the random intercept for participants was removed because it is no longer applicable.

750

751  $Effect\ size \sim condition + (1 | Participant)$

752

## 753 **Results**

754

### 755 *Does music elicit a response in the language network?*

756

757 As discussed in the Introduction, a brain region that supports (some aspect of) music processing,  
758 including structure processing, should show a strong response to music stimuli. To test whether  
759 language regions respond to music, we used four contrasts using data from Experiments 1 and 2.  
760 First, we compared the responses to each of the music conditions (orchestral music, single  
761 instrument music, synthetic drum music, and synthetic melodies in Experiment 1; well-formed  
762 melodies in Experiment 2) against the fixation baseline—the most liberal baseline. Second, we  
763 compared the responses to the music conditions against the response to the nonword strings  
764 condition—an unstructured and meaningless linguistic stimulus (in Experiment 1, we used the  
765 auditory nonwords condition, and in Experiment 2, we used the visual nonwords condition from  
766 the language localizer). Third, in Experiment 1, we additionally compared the responses to the  
767 music conditions against the response to non-linguistic, non-music stimuli (animal and  
768 environmental sounds). A brain region that supports music processing should elicit a strong  
769 positive response relative to the fixation baseline and the nonwords condition (our baseline for

770 the language regions); further, if the response is selective, it should be stronger than the response  
771 elicited by non-music auditory stimuli. Finally, in Experiment 1, we also directly compared the  
772 responses to songs vs. lyrics. A brain region that responds to music should respond more  
773 strongly to songs given that they contain a melodic contour in addition to the linguistic content.  
774  
775 None of the music conditions elicited a strong response in the language network (**Figure 3**;  
776 **Table 3**). The responses to music (i) fell at or below the fixation baseline (except for the well-  
777 formed melodies condition in Experiment 2, which elicited a small positive response in some  
778 regions), (ii) were lower than the response elicited by auditory nonwords (except for the LMFG  
779 language fROI, where the responses to music and nonwords were similarly low), and (iii) did not  
780 significantly differ from the responses elicited by non-linguistic, non-music conditions. Finally,  
781 the response to songs, which contain both linguistic content and a melodic contour, was not  
782 significantly higher than the response elicited by the linguistic content alone (lyrics); in fact, at  
783 the network level, the response to songs was reliably lower than to lyrics.  
784

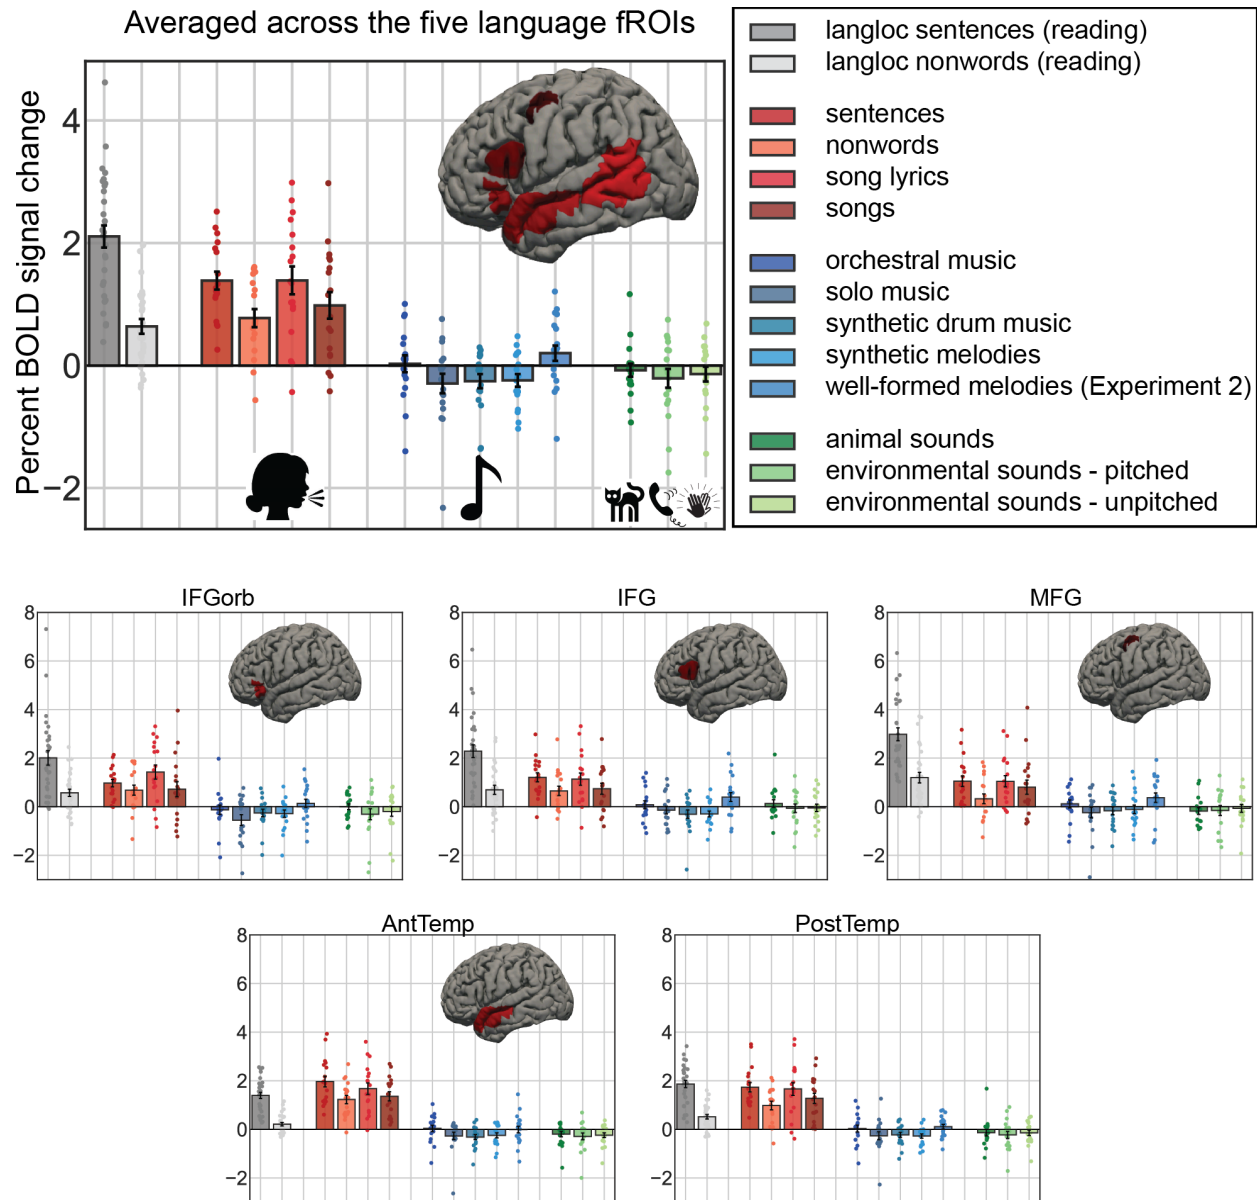

785

786 **Figure 3.** Responses of the language fROIs (pooling across the network – top, and for each fROI  
 787 individually – bottom) to the language localizer conditions (in grey), to the four auditory conditions  
 788 containing speech in Experiment 1 (red shades), to the five music conditions in Experiments 1 and 2 (blue  
 789 shades), and to the three non-linguistic/non-music auditory conditions (green shades) in Experiment 1.  
 790 Here and elsewhere, the error bars represent standard errors of the mean by participants. For the language  
 791 localizer results, we include here all participants in Experiments 1 and 2. The responses to the music



792 conditions cluster around the fixation baseline, are much lower than the responses to sentences, and are  
 793 not higher than the responses to non-music sounds.  
 794

| Contrast                                | Language network                                                            | LIFGorb                                                              | LIFG                                                                 | LMFG                                                                 | LAnt Temp                                                             | LPost Temp                                                           |
|-----------------------------------------|-----------------------------------------------------------------------------|----------------------------------------------------------------------|----------------------------------------------------------------------|----------------------------------------------------------------------|-----------------------------------------------------------------------|----------------------------------------------------------------------|
| <i>music &gt; fixation</i>              |                                                                             |                                                                      |                                                                      |                                                                      |                                                                       |                                                                      |
| orchestral music<br>>fixation           | $\beta=0.028$<br>se=0.135<br>df=17.383<br>d=0.042<br>t=0.209<br>p=0.837     | $\beta=-0.129$<br>se=0.193<br>df=nan<br>d=nan<br>t=-0.667<br>p=1.000 | $\beta=0.082$<br>se=0.162<br>df=nan<br>d=nan<br>t=0.506<br>p=1.000   | $\beta=0.117$<br>se=0.165<br>df=nan<br>d=nan<br>t=0.711<br>p=1.000   | $\beta=0.040$<br>se=0.130<br>df=nan<br>d=nan<br>t=0.310<br>p=1.000    | $\beta=0.030$<br>se=0.143<br>df=nan<br>d=nan<br>t=0.210<br>p=1.000   |
| single-instrument<br>music<br>>fixation | $\beta=-0.294$<br>se=0.163<br>df=18.616<br>d=-0.378<br>t=-1.809<br>p=0.087  | $\beta=-0.552$<br>se=0.223<br>df=nan<br>d=nan<br>t=-2.471<br>p=0.120 | $\beta=-0.141$<br>se=0.155<br>df=nan<br>d=nan<br>t=-0.906<br>p=1.000 | $\beta=-0.243$<br>se=0.217<br>df=nan<br>d=nan<br>t=-1.122<br>p=1.000 | $\beta=-0.272$<br>se=0.152<br>df=nan<br>d=nan<br>t=-1.794<br>p=0.455  | $\beta=-0.264$<br>se=0.164<br>df=nan<br>d=nan<br>t=-1.611<br>p=0.630 |
| synthetic drum<br>music<br>>fixation    | $\beta=-0.255$<br>se=0.112<br>df=18.000<br>d=-0.432<br>t=-2.281<br>p=0.035* | $\beta=-0.258$<br>se=0.155<br>df=nan<br>d=nan<br>t=-1.667<br>p=0.570 | $\beta=-0.306$<br>se=0.172<br>df=nan<br>d=nan<br>t=-1.780<br>p=0.465 | $\beta=-0.168$<br>se=0.162<br>df=nan<br>d=nan<br>t=-1.040<br>p=1.000 | $\beta=-0.319$<br>se=0.106<br>df=nan<br>d=nan<br>t=-3.020<br>p=0.040* | $\beta=-0.226$<br>se=0.103<br>df=nan<br>d=nan<br>t=-2.189<br>p=0.215 |
| synthetic<br>melodies                   | $\beta=-0.243$<br>se=0.100                                                  | $\beta=-0.286$<br>se=0.154                                           | $\beta=-0.299$<br>se=0.120                                           | $\beta=-0.108$<br>se=0.177                                           | $\beta=-0.247$<br>se=0.103<br>df=nan                                  | $\beta=-0.276$<br>se=0.089<br>df=nan                                 |

|                                                  |                                                                                  |                                                                                |                                                                              |                                                                             |                                                                                |                                                                                |
|--------------------------------------------------|----------------------------------------------------------------------------------|--------------------------------------------------------------------------------|------------------------------------------------------------------------------|-----------------------------------------------------------------------------|--------------------------------------------------------------------------------|--------------------------------------------------------------------------------|
| >fixation                                        | df=18.000<br>d=-0.441<br>t=-2.423<br>p=0.026*                                    | df=nan<br>d=nan<br>t=-1.856<br>p=0.405                                         | df=nan<br>d=nan<br>t=-2.485<br>p=0.120                                       | df=nan<br>d=nan<br>t=-0.611<br>p=1.000                                      | d=nan<br>t=-2.395<br>p=0.140                                                   | d=nan<br>t=-3.093<br>p=0.035*                                                  |
| well-formed<br>melodies (Expt<br>2)<br>>fixation | $\beta$ =0.201<br>se=0.135<br>df=17.483<br>d=0.281<br>t=1.488<br>p=0.155         | $\beta$ =0.139<br>se=0.166<br>df=nan<br>d=nan<br>t=0.836<br>p=1.000            | $\beta$ =0.396<br>se=0.181<br>df=nan<br>d=nan<br>t=2.182<br>p=0.210          | $\beta$ =0.371<br>se=0.197<br>df=nan<br>d=nan<br>t=1.885<br>p=0.375         | $\beta$ =-0.008<br>se=0.136<br>df=nan<br>d=nan<br>t=-0.056<br>p=1.000          | $\beta$ =0.107<br>se=0.096<br>df=nan<br>d=nan<br>t=1.109<br>p=1.000            |
| <b><i>music &gt; nonwords</i></b>                |                                                                                  |                                                                                |                                                                              |                                                                             |                                                                                |                                                                                |
| orchestral music<br>>nonwords                    | $\beta$ =-0.746<br>se=0.092<br>df=157.707<br>d=-0.978<br>t=-8.097<br>p<0.001***  | $\beta$ =-0.811<br>se=0.276<br>df=36.000<br>d=-0.981<br>t=-2.945<br>p=0.030*   | $\beta$ =-0.569<br>se=0.142<br>df=18.000<br>d=-0.779<br>t=-4.015<br>p=0.005* | $\beta$ =-0.210<br>se=0.221<br>df=18.000<br>d=-0.276<br>t=-0.954<br>p=1.000 | $\beta$ =-1.187<br>se=0.147<br>df=18.000<br>d=-1.884<br>t=-8.101<br>p<0.001*** | $\beta$ =-0.950<br>se=0.205<br>df=18.000<br>d=-1.427<br>t=-4.646<br>p<0.001*** |
| single-instrument<br>music<br>>nonwords          | $\beta$ =-1.068<br>se=0.100<br>df=157.689<br>d=-1.314<br>t=-10.714<br>p<0.001*** | $\beta$ =-1.234<br>se=0.296<br>df=36.000<br>d=-1.388<br>t=-4.167<br>p<0.001*** | $\beta$ =-0.791<br>se=0.222<br>df=18.000<br>d=-1.101<br>t=-3.567<br>p=0.010* | $\beta$ =-0.571<br>se=0.235<br>df=18.000<br>d=-0.661<br>t=-2.431<br>p=0.130 | $\beta$ =-1.500<br>se=0.196<br>df=18.000<br>d=-2.236<br>t=-7.648<br>p<0.001*** | $\beta$ =-1.244<br>se=0.234<br>df=17.998<br>d=-1.765<br>t=-5.315<br>p<0.001*** |
| synthetic drum<br>music<br>>nonwords             | $\beta$ =-1.029<br>se=0.087<br>df=157.720<br>d=-1.408                            | $\beta$ =-0.940<br>se=0.212<br>df=18.000<br>d=-1.246                           | $\beta$ =-0.956<br>se=0.182<br>df=18.000<br>d=-1.275                         | $\beta$ =-0.496<br>se=0.245<br>df=18.000<br>d=-0.658                        | $\beta$ =-1.546<br>se=0.187<br>df=18.000<br>d=-2.621                           | $\beta$ =-1.207<br>se=0.177<br>df=18.000<br>d=-2.012                           |

|                                                                        |                                                                                  |                                                                                |                                                                                |                                                                             |                                                                                |                                                                                |
|------------------------------------------------------------------------|----------------------------------------------------------------------------------|--------------------------------------------------------------------------------|--------------------------------------------------------------------------------|-----------------------------------------------------------------------------|--------------------------------------------------------------------------------|--------------------------------------------------------------------------------|
|                                                                        | t=-11.839<br>p<0.001***                                                          | t=-4.430<br>p<0.001***                                                         | t=-5.252<br>p<0.001***                                                         | t=-2.026<br>p=0.290                                                         | t=-8.262<br>p<0.001***                                                         | t=-6.817<br>p<0.001***                                                         |
| synthetic<br>melodies<br>-nonwords                                     | $\beta$ =-1.017<br>se=0.087<br>df=157.683<br>d=-1.421<br>t=-11.623<br>p<0.001*** | $\beta$ =-0.969<br>se=0.209<br>df=18.000<br>d=-1.286<br>t=-4.642<br>p<0.001*** | $\beta$ =-0.949<br>se=0.153<br>df=18.000<br>d=-1.441<br>t=-6.223<br>p<0.001*** | $\beta$ =-0.435<br>se=0.252<br>df=18.000<br>d=-0.556<br>t=-1.727<br>p=0.505 | $\beta$ =-1.474<br>se=0.195<br>df=36.000<br>d=-2.513<br>t=-7.541<br>p<0.001*** | $\beta$ =-1.256<br>se=0.176<br>df=18.000<br>d=-2.164<br>t=-7.136<br>p<0.001*** |
| well-formed<br>melodies (Expt<br>2)<br>>nonwords<br>(visual)           | $\beta$ =-0.449<br>se=0.090<br>df=179.063<br>d=-0.562<br>t=-4.998<br>p<0.001***  | $\beta$ =-0.490<br>se=0.226<br>df=20.989<br>d=-0.611<br>t=-2.164<br>p=0.210    | $\beta$ =-0.403<br>se=0.208<br>df=20.056<br>d=-0.444<br>t=-1.938<br>p=0.335    | $\beta$ =-0.686<br>se=0.250<br>df=20.173<br>d=-0.705<br>t=-2.748<br>p=0.060 | $\beta$ =-0.242<br>se=0.134<br>df=20.737<br>d=-0.470<br>t=-1.812<br>p=0.420    | $\beta$ =-0.375<br>se=0.123<br>df=20.455<br>d=-0.792<br>t=-3.056<br>p=0.030*   |
| <b><i>music &gt; non-linguistic, non-music auditory conditions</i></b> |                                                                                  |                                                                                |                                                                                |                                                                             |                                                                                |                                                                                |
| music<br>(combined)<br>>animal sounds                                  | $\beta$ =-0.114<br>se=0.060<br>df=427.876<br>d=-0.177<br>t=-1.915<br>p=0.056     | $\beta$ =-0.306<br>se=0.148<br>df=72.000<br>d=-0.422<br>t=-2.069<br>p=0.210    | $\beta$ =-0.295<br>se=0.146<br>df=72.000<br>d=-0.451<br>t=-2.021<br>p=0.235    | $\beta$ =0.080<br>se=0.151<br>df=72.000<br>d=0.111<br>t=0.528<br>p=1.000    | $\beta$ =-0.002<br>se=0.090<br>df=72.000<br>d=-0.004<br>t=-0.023<br>p=1.000    | $\beta$ =-0.048<br>se=0.094<br>df=72.000<br>d=-0.088<br>t=-0.513<br>p=1.000    |
| music<br>(combined)<br>>environmental<br>(pitched)                     | $\beta$ =0.019<br>se=0.060<br>df=427.902<br>d=0.028<br>t=0.307<br>p=0.759        | $\beta$ =0.005<br>se=0.144<br>df=72.000<br>d=0.006<br>t=0.033<br>p=1.000       | $\beta$ =-0.104<br>se=0.133<br>df=72.000<br>d=-0.156<br>t=-0.781<br>p=1.000    | $\beta$ =0.055<br>se=0.159<br>df=72.000<br>d=0.071<br>t=0.347<br>p=1.000    | $\beta$ =0.092<br>se=0.094<br>df=72.000<br>d=0.171<br>t=0.975<br>p=1.000       | $\beta$ =0.045<br>se=0.094<br>df=72.000<br>d=0.081<br>t=0.475<br>p=1.000       |

|                                                                              |                |                |                |                |                |                |
|------------------------------------------------------------------------------|----------------|----------------|----------------|----------------|----------------|----------------|
| music                                                                        | $\beta=-0.052$ | $\beta=-0.109$ | $\beta=-0.118$ | $\beta=-0.030$ | $\beta=0.042$  | $\beta=-0.043$ |
| (combined)                                                                   | se=0.063       | se=0.163       | se=0.152       | se=0.151       | se=0.097       | se=0.100       |
| >environmental                                                               | df=427.856     | df=72.000      | df=72.000      | df=72.000      | df=72.000      | df=72.000      |
| (unpitched)                                                                  | d=-0.079       | d=-0.140       | d=-0.182       | d=-0.040       | d=0.083        | d=-0.082       |
|                                                                              | t=-0.823       | t=-0.666       | t=-0.778       | t=-0.198       | t=0.429        | t=-0.426       |
|                                                                              | p=0.411        | p=1.000        | p=1.000        | p=1.000        | p=1.000        | p=1.000        |
| <b><i>(melodic contour + linguistic content) &gt; linguistic content</i></b> |                |                |                |                |                |                |
| songs                                                                        | $\beta=-0.408$ | $\beta=-0.705$ | $\beta=-0.394$ | $\beta=-0.243$ | $\beta=-0.313$ | $\beta=-0.384$ |
| >lyrics                                                                      | se=0.102       | se=0.287       | se=0.195       | se=0.219       | se=0.163       | se=0.171       |
|                                                                              | df=157.896     | df=18.000      | df=18.000      | df=18.000      | df=18.000      | df=18.000      |
|                                                                              | d=-0.377       | d=-0.569       | d=-0.400       | d=-0.226       | d=-0.356       | d=-0.392       |
|                                                                              | t=-4.014       | t=-2.454       | t=-2.025       | t=-1.107       | t=-1.925       | t=-2.246       |
|                                                                              | p<0.001***     | p=0.125        | p=0.290        | p=1.000        | p=0.350        | p=0.185        |

795 **Table 3.** Statistical results (two-sided) for the contrasts between music conditions and three kinds of  
796 baselines (fixation, nonwords, and non-linguistic non-music auditory conditions—animal sounds and  
797 environmental sounds) in Experiments 1 and 2, and for the contrast between songs and lyrics in  
798 Experiment 1. Abbreviations: b=the beta estimate for the effect; se=standard error of the mean by  
799 participants; df=degrees of freedom; d=Cohen’s d (Westfall et al. 2014; Brysbaert and Stevens 2018);  
800 t=the t statistic; p=the significance value (for the individual fROIs, these values have been FDR-corrected  
801 for the number of fROIs (n=5)). In light grey, we highlight the results that are **not consistent** with the role  
802 of the language regions in music perception: of the 84 tests performed, 1 showed an effect predicted by  
803 language-music overlap accounts: a small and statistically weak (only emerging at the network level but  
804 not in any individual fROI) positive response, relative to the weakest baseline (fixation), to one of the five  
805 music conditions examined; and this response was still ~4 times lower than the response to an  
806 unstructured linguistic condition (nonwords).  
807

808 *Is the language network sensitive to structure in music?*

809

810 Experiments 1 and 2 (fMRI): Because most prior claims about the overlap between language and  
811 music concern the processing of *structure*—given the parallels that can be drawn between the  
812 syntactic structure of language and the tonal and rhythmic structure in music (e.g., Lerdahl and  
813 Jackendoff 1977, 1983; cf. Jackendoff 2009)—we used three contrasts to test whether language  
814 regions are sensitive to music structure. First and second, in Experiment 1, we compared the  
815 responses to synthetic melodies vs. their scrambled counterparts, and to synthetic drum music vs.  
816 the scrambled drum music condition. The former targets both tonal and rhythmic structure, and  
817 the latter selectively targets rhythmic structure. The reason to examine rhythmic structure is that  
818 some patient studies have argued that pitch contour processing relies on the right hemisphere,  
819 and rhythm processing draws on the left hemisphere (e.g., Zatorre 1984; Peretz 1990; Alcock et  
820 al. 2000; cf. Boebinger 2021 for fMRI evidence of bilateral responses in high-level auditory  
821 areas to both tonal and rhythmic structure processing and for lack of spatial segregation between  
822 the two), so although most prior work examining the language-music relationship has focused on  
823 tonal structure, rhythmic structure may *a priori* be more likely to overlap with linguistic  
824 syntactic structure given their alleged co-lateralization based on the patient literature. And third,  
825 in Experiment 2, we compared the responses to well-formed melodies vs. melodies with a sour  
826 note. A brain region that responds to structure in music should respond more strongly to intact  
827 than scrambled music (similar to how language regions respond more strongly to sentences than  
828 lists of words; e.g., Fedorenko et al. 2010; Diachek, Blank, Siegelman et al. 2020), and also  
829 exhibit sensitivity to structure violations (similar to how language regions respond more strongly  
830 to sentences that contain grammatical errors: e.g., Embick et al. 2000; Newman et al. 2001;

831 Kuperberg et al. 2003; Cooke et al. 2006; Friederici et al. 2010; Herrmann et al. 2012; Fedorenko  
832 et al. 2020). Note that given the lack of a strong and consistent response to music in the language  
833 regions (**Figure 3** and **Table 3**), the answer to this narrower question is somewhat of a foregone  
834 conclusion: even if one or more of the language regions showed a reliable effect in these music-  
835 structure-probing contrasts, such effects would be difficult to interpret as reflecting music  
836 structure processing given that structured music stimuli elicit a response approximately at the  
837 level of the fixation baseline in the language areas. Nevertheless, we report the results for these  
838 three contrasts for completeness, and because most prior studies have focused on such contrasts.  
839  
840 The language regions did not show consistent sensitivity to structural manipulations in music  
841 (**Figure 4; Table 4**). In Experiment 1, the responses to synthetic melodies did not significantly  
842 differ from (or were weaker than) the responses to the scrambled counterparts, and the responses  
843 to synthetic drum music did not significantly differ from the responses to scrambled drum music.  
844 In Experiment 2, at the network level, we observed a small and weakly significant ( $p < 0.05$ )  
845 effect of *sour-note > well-formed melodies*. This effect was not significant in any of the five  
846 individual fROIs (even prior to the FDR correction).  
847

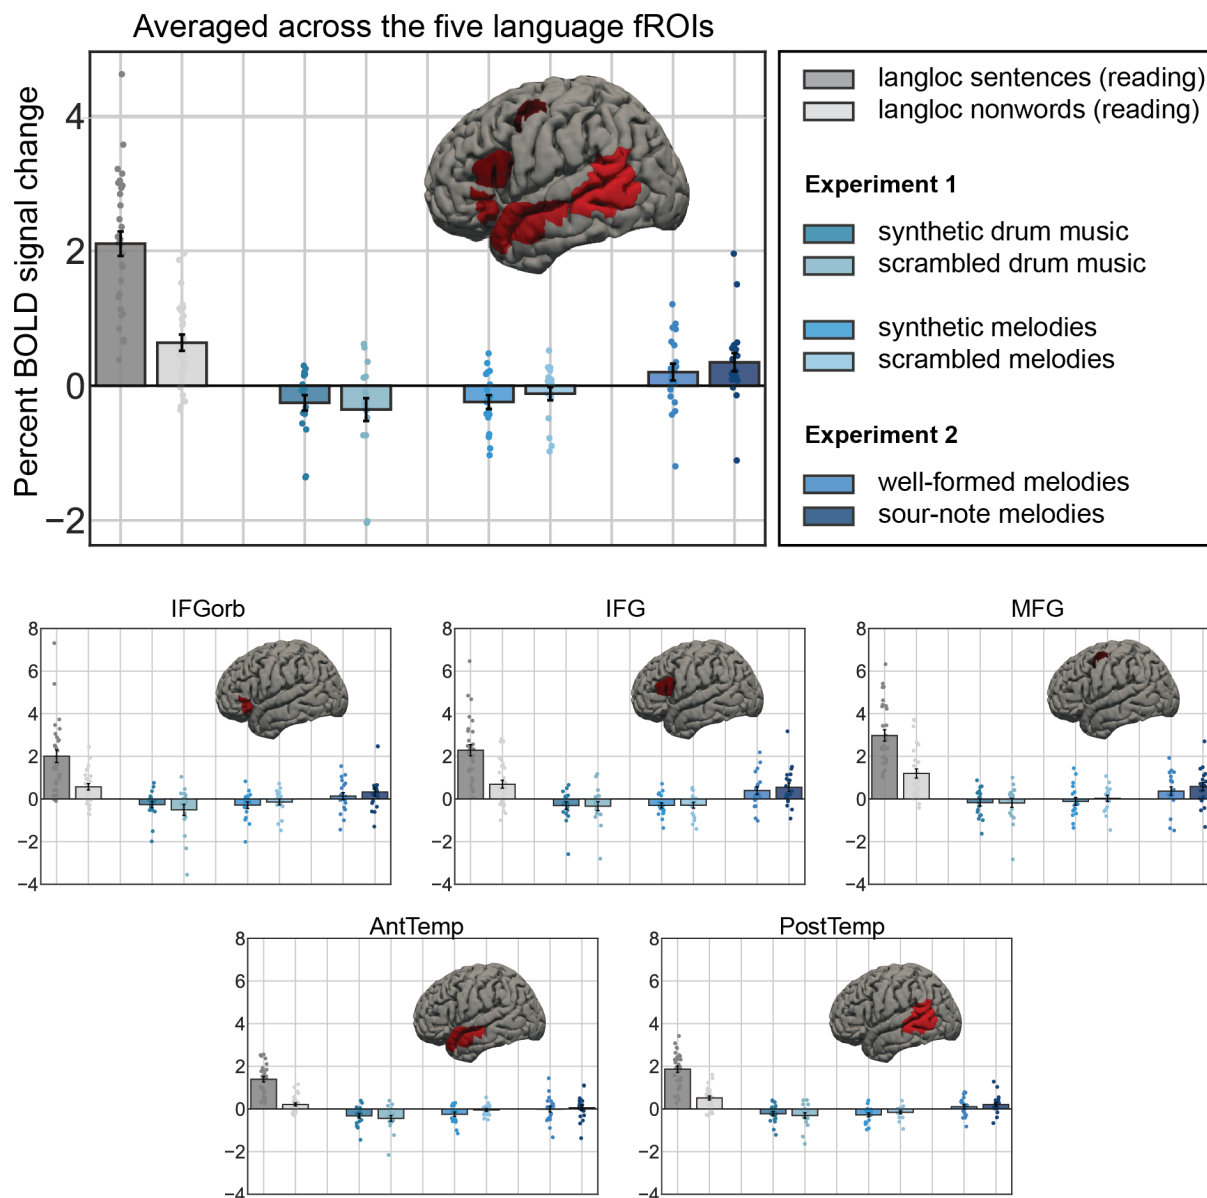

848

849 **Figure 4.** Responses of the language fROIs (pooling across the network – top, and for each fROI

850 individually – bottom) to the language localizer conditions (in grey), and to the three sets of conditions

851 that target structure in music (in blue). The error bars represent standard error of the mean by participants.

852 For the language localizer results, we include here participants in Experiments 1 and 2. The responses to

853 the music conditions cluster around the fixation baseline, and are much lower than the response to

854 sentences. One of the three critical contrasts (*sour-note* > *well-formed* melodies) elicits a small and

855 weakly reliable effect at the network level, but it is not individually significant in any of the five fROIs.

856

| <b>Contrast</b>                                  | <b>Language network</b>                                                      | <b>LIFGorb</b>                                                             | <b>LIFG</b>                                                                | <b>LMFG</b>                                                                | <b>LAnt Temp</b>                                                           | <b>LPost Temp</b>                                                          |
|--------------------------------------------------|------------------------------------------------------------------------------|----------------------------------------------------------------------------|----------------------------------------------------------------------------|----------------------------------------------------------------------------|----------------------------------------------------------------------------|----------------------------------------------------------------------------|
| synthetic drum music >scrambled drum music       | $\beta=0.099$<br>se=0.073<br>df=157.823<br>d=0.140<br>t=1.358<br>p=0.176     | $\beta=0.252$<br>se=0.191<br>df=18.000<br>d=0.288<br>t=1.322<br>p=1.000    | $\beta=0.027$<br>se=0.176<br>df=18.000<br>d=0.034<br>t=0.156<br>p=1.000    | $\beta=0.014$<br>se=0.186<br>df=18.000<br>d=0.018<br>t=0.073<br>p=1.000    | $\beta=0.124$<br>se=0.103<br>df=18.000<br>d=0.247<br>t=1.210<br>p=1.000    | $\beta=0.079$<br>se=0.110<br>df=18.000<br>d=0.165<br>t=0.718<br>p=1.000    |
| synthetic melodies >scrambled synthetic melodies | $\beta=-0.124$<br>se=0.061<br>df=157.720<br>d=-0.238<br>t=-2.015<br>p=0.046* | $\beta=-0.147$<br>se=0.130<br>df=18.000<br>d=-0.245<br>t=-1.133<br>p=1.000 | $\beta=-0.009$<br>se=0.153<br>df=18.000<br>d=-0.017<br>t=-0.057<br>p=1.000 | $\beta=-0.143$<br>se=0.202<br>df=18.000<br>d=-0.216<br>t=-0.708<br>p=1.000 | $\beta=-0.199$<br>se=0.101<br>df=18.000<br>d=-0.572<br>t=-1.971<br>p=0.320 | $\beta=-0.121$<br>se=0.106<br>df=18.000<br>d=-0.365<br>t=-1.142<br>p=1.000 |
| sour-note melodies >well-formed melodies         | $\beta=0.145$<br>se=0.069<br>df=175.884<br>d=0.196<br>t=2.102<br>p=0.037*    | $\beta=0.195$<br>se=0.098<br>df=20.000<br>d=0.245<br>t=1.985<br>p=0.305    | $\beta=0.150$<br>se=0.105<br>df=20.000<br>d=0.180<br>t=1.431<br>p=0.840    | $\beta=0.212$<br>se=0.090<br>df=20.000<br>d=0.252<br>t=2.363<br>p=0.140    | $\beta=0.065$<br>se=0.051<br>df=20.000<br>d=0.114<br>t=1.280<br>p=1.000    | $\beta=0.104$<br>se=0.056<br>df=20.000<br>d=0.248<br>t=1.856<br>p=0.390    |

857 **Table 4.** Statistical results (two-sided) for the contrasts between the synthetic drum music and scrambled  
858 drum music, synthetic melodies and scrambled synthetic melodies, and sour-note and well-formed  
859 melodies contrasts in Experiments 1 and 2. Abbreviations: b=the beta estimate for the effect; se=standard  
860 error of the mean by participants; df=degrees of freedom; d=Cohen’s d (Westfall et al. 2014; Brysbaert  
861 and Stevens 2018); t=the t statistic; p=the significance value (for the individual fROIs, these values have  
862 been FDR-corrected for the number of fROIs (n=5)). In light grey, we highlight the results that are *not*



863 **consistent** with the role of the language regions in the processing of music structure: of the 18 tests  
864 performed, 1 showed an effect predicted by language-music overlap accounts: a small and statistically  
865 weak response to one of the three structure-targeting contrasts (in the presence of an overall very weak  
866 response to music relative to fixation; see Figure 3 and Table 3).

867

868

869 Experiment 3 (behavioral): In Experiment 3, we further asked whether individuals with severe  
870 deficits in processing linguistic syntax also exhibit difficulties in processing music structure. To  
871 do so, we assessed participants' ability to discriminate well-formed ("good") melodies from  
872 melodies with a sour note ("bad"), while controlling for their response bias (how likely they are  
873 overall to say that something is well-formed) by computing  $d'$  for each participant (Green and  
874 Swets 1966), in addition to proportion correct. We then compared the  $d'$  values of each  
875 individual with aphasia to the distribution of  $d'$  values of healthy control participants using a  
876 Bayesian test for single case assessment (Crawford and Garthwaite 2007) as implemented in the  
877 *psycho* package in R (Makowski 2018). (Note that for the linguistic syntax tasks, it was not  
878 necessary to conduct statistical tests comparing the performance of each individual with aphasia  
879 to the control distribution because the performance of each individual with aphasia was lower  
880 than 100% of the control participants' performances.) We similarly compared the proportion  
881 correct on the MBEA scale task of each individual with aphasia to the distribution of accuracies  
882 of healthy controls. If linguistic and music syntax draw on the same resources, then individuals  
883 with linguistic syntactic impairments should also exhibit deficits on tasks requiring the  
884 processing of music syntax.

885

886 In the critical music task, where participants were asked to judge the well-formedness of musical  
887 structure, neurotypical control participants responded correctly, on average, on 87.1% of trials,  
888 suggesting that the task was sufficiently difficult to preclude ceiling effects. Patients with severe  
889 aphasia showed intact sensitivity to music structure. The three patients had accuracies of 89.4%  
890 (PR), 94.4% (SA), and 97.8% (PP), falling on the higher end of the controls' performance range  
891 (**Figure 5; Table 5**). Crucially, none of the three aphasic participants'  $d'$  scores were lower than  
892 the average control participants'  $d'$  scores ( $M = 2.75$ ,  $SD = 0.75$ ). In fact, the patients'  $d'$  scores  
893 were high: SA's  $d'$  was 3.51, higher than 83.91% (95% Credible Interval (CI) [75.20, 92.03]) of  
894 the control population, PR's  $d'$  was 3.09, higher than 67.26% (95% CI [56.60, 78.03]) of the  
895 control population, and PP's  $d'$  was 3.99, higher than 94.55% (95% CI [89.40, 98.57]) of the  
896 control population. None of the three aphasic participants' bias/criterion  $c$  scores (Green and  
897 Swets 1966) differed reliably from the control participants'  $c$  scores ( $M = -0.40$ ,  $SD = 0.40$ ).  
898 SA's  $c$  was -0.53, lower than 62.34% (95% CI [50.40, 71.67]) of the control population, PR's  $c$   
899 was -0.74, lower than 79.48% (95% CI [69.58, 88.44]) of the control population, and PP's  $c$  was  
900 -0.29, higher than 60.88% (95% CI [50.08, 70.04]) of the control population. In the Scale task  
901 from the Montreal Battery for the Evaluation of Aphasia, the control participants' performance  
902 showed a similar distribution to that reported in Peretz et al. (2003). All participants with aphasia  
903 performed within the normal range, with two participants making no errors. PR and PP's score  
904 was higher than 85.24% (95% CI [76.94, 93.06]) of the control population, providing a  
905 conceptual replication of the results from the well-formed/sour-note melody discrimination task.  
906 SA's score was higher than 30.57% (95% CI [20.00, 41.50]) of the control population.

907

| Participant | SA | PR | PP | Controls |
|-------------|----|----|----|----------|
|-------------|----|----|----|----------|

|                                                      |         |         |         |                                                                      |
|------------------------------------------------------|---------|---------|---------|----------------------------------------------------------------------|
| <b>Critical Music Task</b>                           | 170/180 | 161/180 | 176/180 | M = 156.5/180<br>SD = 15.8<br>Min = 109/180<br>Max = 177/180<br>N=45 |
| <b>Montreal Battery for the Evaluation of Amusia</b> |         |         |         |                                                                      |
| (Critical for this study) Task 1 (Scale)             | 27/30   | 30/30   | 30/30   | M = 28/30<br>SD = 1.89<br>Min = 23/30<br>Max = 30/30<br>N = 45       |
| Task 2 (Interval; “Same Contour” on MBEA CD)         | 26/30   | 22/30   | 18/30   |                                                                      |
| Task 3 (Contour; “Different Contour” on MBEA CD)     | 22/30   | 23/30   | 18/30   |                                                                      |
| Task 4 (Rhythm; “Rhythmic Contour” on MBEA CD)       | 25/30   | 25/30   | 22/30   |                                                                      |
| Task 5 (Meter; “Metric” on MBEA CD)                  | 28/30   | 22/30   | 24/30   |                                                                      |
| Task 6 (Incidental Memory)                           | 28/30   | 28/30   | 22/30   |                                                                      |

908 **Table 5.** Results for participants with aphasia and control participants on the critical music task and the  
 909 Scale task of the MBEA (Peretz et al., 2003). For participants with aphasia, we report the results from all  
 910 six MBEA tasks, for completeness.

911

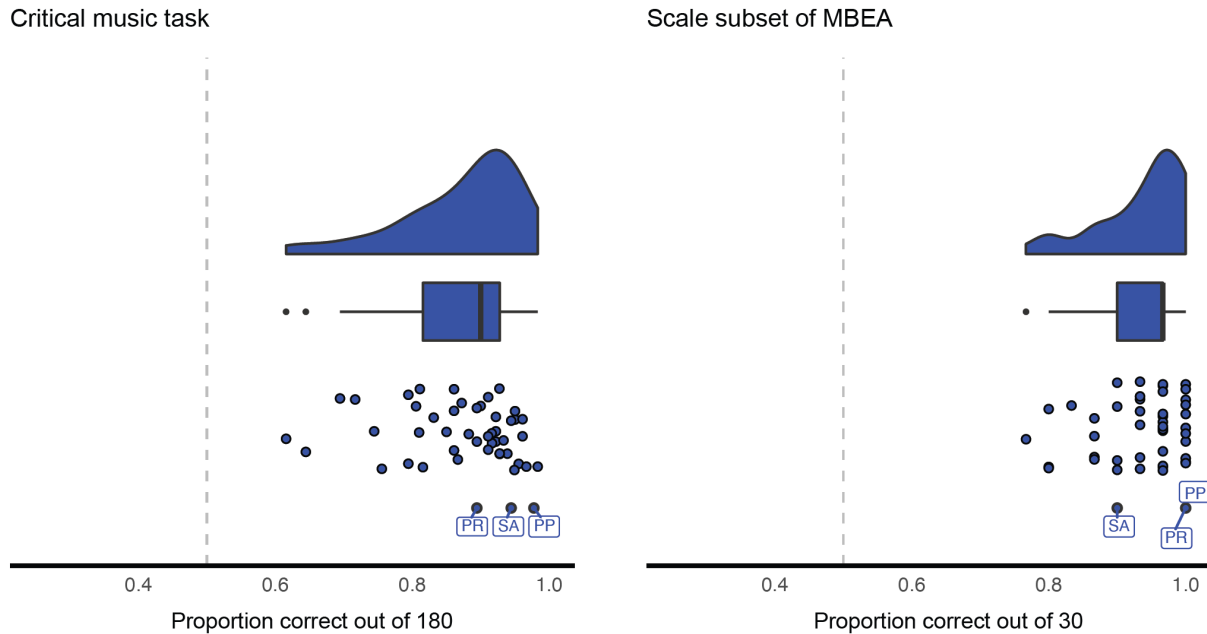

912

913 **Figure 5.** Performance of the control and aphasic participants on two measures of music syntax processing:

914 the critical music task (left), the Scale task of the MBEA (right). The densities show the distribution of

915 proportion correct scores in the control participants and the boxplot shows the quartiles of the control

916 population (the whiskers show 1.5x interquartile range and points represent outliers). The dots show

917 individual participants (for the aphasic individuals, the initials indicate the specific participant). Dashed

918 grey lines indicate chance performance.

919

920 *Does music elicit a response in the language network of native speakers of a tonal language?*

921

922 The above analyses focus on the language network's responses to music stimuli and its

923 sensitivity to music structure in English native speakers. However, some have argued that

924 responses to music may differ in speakers of languages that use pitch to make lexical or

925 grammatical distinctions (e.g., Deutsch et al. 2006, 2009; Bidelman et al. 2011; Creel et al. 2018;

926 Ngo et al. 2016, Liu et al. 2021). In Experiment 4, we therefore tested whether language regions

927 of Mandarin native speakers respond to music. Similar to Experiment 1, we compared the  
928 response to the music condition against a) the fixation baseline, b) the foreign language  
929 condition, and c) a non-linguistic, non-music condition (environmental sounds). A brain region  
930 that supports music processing should respond more strongly to music than the fixation baseline  
931 and the foreign condition; if the response is further selective, it should be stronger than the  
932 response elicited by environmental sounds.

933

934 Results from Mandarin native speakers replicated the results from Experiment 1: the music  
935 condition did not elicit a strong response in the language network (**Figure 6; Table 6**). Although  
936 the response to music was above the fixation baseline at the network level and in some fROIs,  
937 the response did not differ from (or was lower than) the responses elicited by an unfamiliar  
938 foreign language (Russian) and environmental sounds.

939

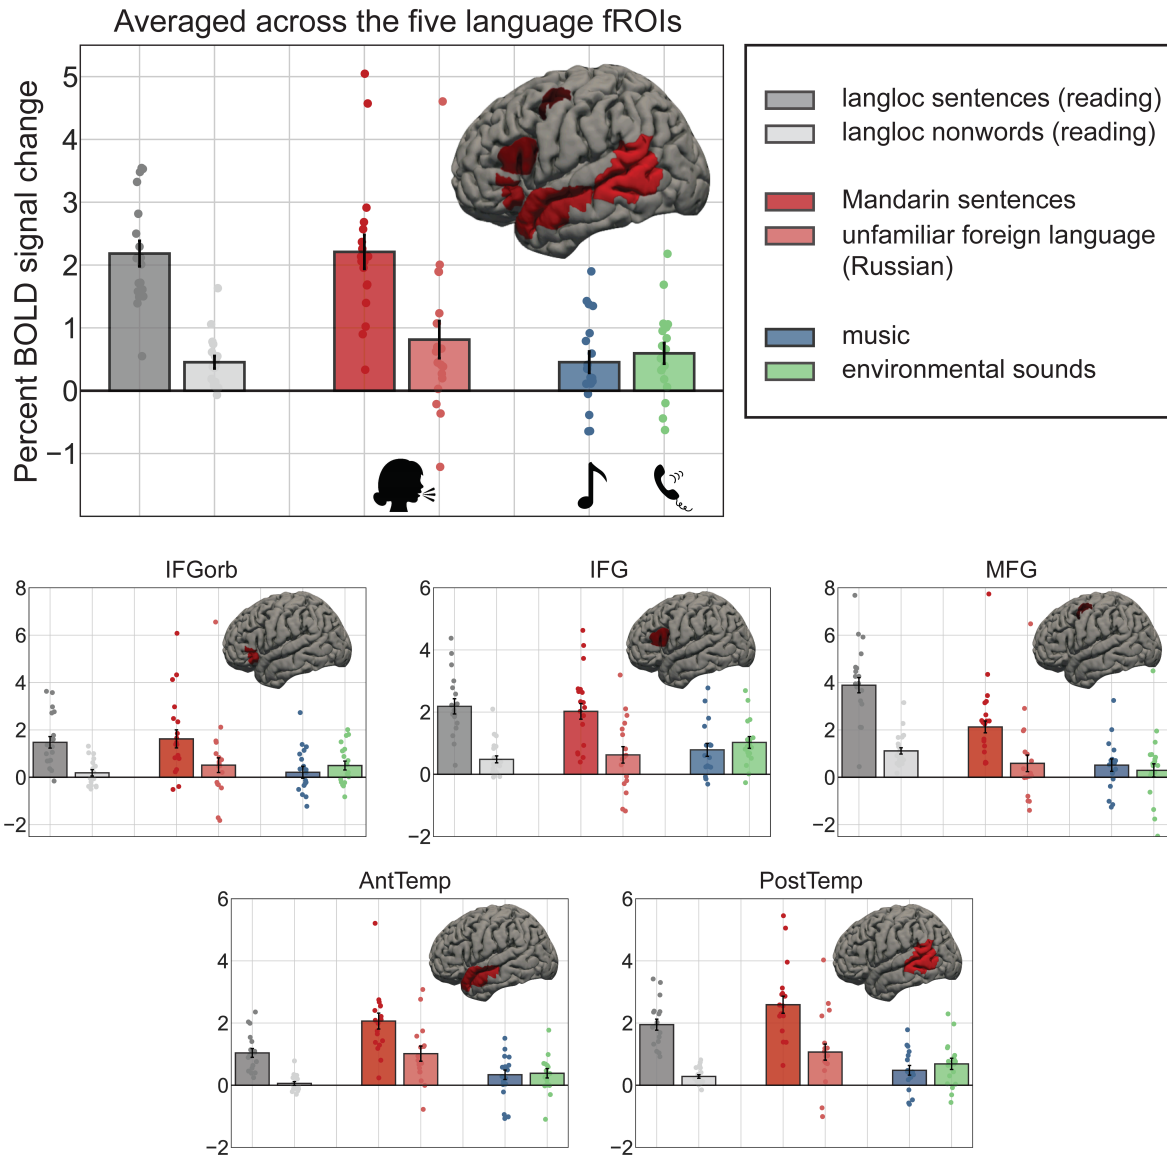

940

941 **Figure 6.** Responses of the language fROIs (pooling across the network – top, and for each fROI  
942 individually – bottom) to the language localizer conditions (in grey), to the two auditory conditions  
943 containing speech (red shades), to the music condition (blue), and to the non-linguistic/non-music  
944 auditory condition (green) in Experiment 4. The error bars represent standard error of the mean by  
945 participants. The response to the music condition is much lower than the response to sentences, and is not  
946 higher than the response to foreign language and environmental sounds.

947

| Contrast                    | Language network                                                             | LIFGorb                                                                    | LIFG                                                                       | LMFG                                                                       | LAnt Temp                                                                  | LPost Temp                                                                 |
|-----------------------------|------------------------------------------------------------------------------|----------------------------------------------------------------------------|----------------------------------------------------------------------------|----------------------------------------------------------------------------|----------------------------------------------------------------------------|----------------------------------------------------------------------------|
| music >fixation             | $\beta=0.454$<br>se=0.177<br>df=17.646<br>d=0.517<br>t=2.565<br>p=0.020*     | $\beta=0.299$<br>se=0.228<br>df=nan<br>d=nan<br>t=1.308<br>p=1.000         | $\beta=0.761$<br>se=0.207<br>df=nan<br>d=nan<br>t=3.683<br>p=0.010*        | $\beta=0.480$<br>se=0.260<br>df=nan<br>d=nan<br>t=1.848<br>p=0.410         | $\beta=0.268$<br>se=0.171<br>df=nan<br>d=nan<br>t=1.568<br>p=0.675         | $\beta=0.462$<br>se=0.156<br>df=nan<br>d=nan<br>t=2.962<br>p=0.045*        |
| music >foreign              | $\beta=-0.359$<br>se=0.141<br>df=162.000<br>d=-0.308<br>t=-2.547<br>p=0.012* | $\beta=-0.360$<br>se=0.416<br>df=18.000<br>d=-0.258<br>t=-0.865<br>p=1.000 | $\beta=0.123$<br>se=0.309<br>df=18.000<br>d=0.124<br>t=0.398<br>p=1.000    | $\beta=-0.219$<br>se=0.473<br>df=18.000<br>d=-0.149<br>t=-0.463<br>p=1.000 | $\beta=-0.703$<br>se=0.240<br>df=18.000<br>d=0.870<br>t=-2.926<br>p=0.045* | $\beta=-0.638$<br>se=0.254<br>df=18.000<br>d=-0.686<br>t=-2.511<br>p=0.110 |
| music >environmental sounds | $\beta=-0.141$<br>se=0.108<br>df=157.749<br>d=-0.154<br>t=-1.299<br>p=0.196  | $\beta=-0.249$<br>se=0.187<br>df=18.000<br>d=-0.280<br>t=-1.328<br>p=1.000 | $\beta=-0.240$<br>se=0.193<br>df=18.000<br>d=-0.302<br>t=-1.248<br>p=1.000 | $\beta=0.038$<br>se=0.304<br>df=18.000<br>d=0.030<br>t=0.125<br>p=1.000    | $\beta=-0.042$<br>se=0.147<br>df=18.000<br>d=0.065<br>t=-0.285<br>p=1.000  | $\beta=-0.210$<br>se=0.179<br>df=18.000<br>d=-0.310<br>t=-1.171<br>p=1.000 |

948 **Table 6.** Statistical results (two-sided) for the contrasts between the music condition and fixation, foreign  
949 language, and environmental sounds in Experiment 4. Abbreviations: b=the beta estimate for the effect;  
950 se=standard error of the mean by participants; df=degrees of freedom; d=Cohen’s d (Westfall et al. 2014;  
951 Brysbaert and Stevens 2018); t=the t statistic; p=the significance value (for the individual fROIs, these  
952 values have been FDR-corrected for the number of fROIs (n=5)). In light grey, we highlight the results  
953 that are *not consistent* with the role of the language regions in music perception: of the 18 tests  
954 performed, 3 showed an effect predicted by language-music overlap accounts: a small positive response

955 to the music condition relative to the weakest baseline (fixation) at the network level and in two fROIs  
956 individually; this response was still ~2 lower than the unfamiliar foreign language condition and was  
957 numerically lower than the environmental sounds condition.

958

959

## 960 **Discussion**

961

962 We here tackled a much investigated but still debated question: do the brain regions of the  
963 language network support the processing of music, especially music structure? Across three  
964 fMRI experiments, we obtained a clear answer: the brain regions of the language network, which  
965 support the processing of linguistic syntax (e.g., Fedorenko et al. 2010, 2020; Pallier et al. 2011;  
966 Bautista and Wilson 2016; Blank et al. 2016), do not support music processing (see **Table 7** for a  
967 summary of the results). We found overall low responses to music (including orchestral pieces,  
968 solo pieces played on different instruments, synthetic music, and vocal music) in the language  
969 brain regions (**Figure 3**; see Sueoka et al. 2022, for complementary evidence from the inter-  
970 subject correlation approach applied to a rich naturalistic music stimulus), including in speakers  
971 of a tonal language (**Figure 6**), and no consistent sensitivity to manipulations of music structure  
972 (**Figure 4**). We further found that the ability to make well-formedness judgments about the tonal  
973 structure of music was preserved in patients with severe aphasia who cannot make  
974 grammaticality judgments for sentences (**Figure 5**), although we acknowledge the possibility  
975 that general ability to detect unexpected events may have contributed to performance on the  
976 critical music-structure tasks (e.g., Bigand et al. 2014; Collins et al. 2014) and that additional  
977 controls would be needed to conclusively determine whether these patients have preserved



978 music-structure processing abilities. Nevertheless, given the brain imaging results (summarized  
 979 in **Table 7**), a critical role of the language system in music structure processing is unlikely.  
 980  
 981 Our findings align with a) prior neuropsychological patient evidence of language/music  
 982 dissociations (e.g., Luria et al. 1965; Brust 1980; Marin 1982; Basso and Capitani 1985; Polk  
 983 and Kertesz 1993; Peretz et al. 1994, 1997; Piccirilli et al. 2000; Peretz and Coltheart 2003;  
 984 Slevc et al. 2016; Faroqi-Shah et al. 2020; Chiapetta et al. 2022) and with b) prior evidence that  
 985 music is processed by music-selective areas in the auditory cortex (Norman-Haignere et al.  
 986 (2015; see also Boebinger et al. 2021; see Peretz et al. 2015, for review and discussion). The  
 987 latter, music-selective areas are strongly sensitive to the scrambling of music structure in stimuli  
 988 like those used here in Experiment 1 (see also Fedorenko et al. 2012c, Boebinger 2021; see Mehr  
 989 et al. 2019 for *a priori* reasons to expect the effects of tonal structure manipulations in music-  
 990 selective brain regions). (We provide the responses of music-responsive areas to the conditions  
 991 of Experiments 1 and 2 at: <https://osf.io/68y7c/>.) In contrast, our findings stand in sharp contrast  
 992 to numerous reports arguing for shared structure processing mechanisms in the two domains,  
 993 including specifically in the inferior frontal cortex, within ‘Broca’s area’ (e.g., Patel et al. 1998;  
 994 Koelsch et al. 2000; Maess et al. 2001; Koelsch et al. 2002; Levitin and Menon 2003; see Kunert  
 995 and Slevc 2015; LaCroix et al. 2016; Vuust et al. 2022 for reviews).  
 996

|                                           | Contrast                                                  | Experiment 1 | Experiment 2                             | Experiment 4 |
|-------------------------------------------|-----------------------------------------------------------|--------------|------------------------------------------|--------------|
| <b>Basic sensitivity to music stimuli</b> | Music > fixation<br>(6 different music conditions tested: | <b>No</b>    | <b>No</b> (except for the network level) | <b>Yes</b>   |

|                                                                    |                                                                                     |           |                                             |           |
|--------------------------------------------------------------------|-------------------------------------------------------------------------------------|-----------|---------------------------------------------|-----------|
|                                                                    | 4 in Expt1, 1 in Expt2,<br>and 1 in Expt4)                                          |           |                                             |           |
|                                                                    | Music ><br>nonwords/unfamiliar<br>foreign language                                  | <b>No</b> |                                             | <b>No</b> |
|                                                                    | Music > non-linguistic,<br>non-music auditory<br>conditions                         | <b>No</b> |                                             | <b>No</b> |
|                                                                    | Songs (melodic contour<br>+ linguistic content) ><br>Lyrics (linguistic<br>content) | <b>No</b> |                                             |           |
|                                                                    |                                                                                     |           |                                             |           |
| <b>Sensitivity to<br/>manipulations<br/>of music<br/>structure</b> | Intact music > scrambled<br>music (synthetic<br>melodies)                           | <b>No</b> |                                             |           |
|                                                                    | Intact music > scrambled<br>music (synthetic drums)                                 | <b>No</b> |                                             |           |
|                                                                    | Sour-note melodies ><br>well-formed melodies                                        |           | <b>No</b> (except for the<br>network level) |           |

997 **Table 7.** A summary of the results for the tests of the language network’s sensitivity to music in general  
998 and to music structure specifically. This pattern of results constitutes strong evidence against the role of  
999 the language system—or any of its components—in music perception, including the processing of music  
1000 structure. With respect to sensitivity to music stimuli: 4 of the 6 conditions failed to elicit a response  
1001 above the low-level (fixation) baseline anywhere in the language network; 1 condition (in Experiment 2)  
1002 elicited a small and weakly significant above-fixation response at the network level only (not in any  
1003 individual fROIs); and 1 condition (in Experiment 4) elicited a small above-fixation response (including

1004 in two individual fROIs) but this response was not higher than that elicited by other auditory conditions  
1005 like environmental sounds. With respect to sensitivity to music structure: 2 of the 3 manipulations failed  
1006 to elicit a response anywhere in the language network, and the remaining manipulation elicited a small  
1007 and weakly significant effect at the network level, which was not reliable in any individual ROI.

1008

1009

1010 Below, we discuss several issues that are relevant for interpreting the current results and/or that  
1011 these results inform, and outline some limitations of scope of our study.

1012

1013 ***1. Theoretical considerations about the language-music relationship.***

1014

1015 Why might we *a priori* think that the language network, or some of its components, may be  
1016 important for processing music in general, or for processing music structure specifically?

1017 Similarities between language and music have long been noted and discussed. For example, as  
1018 summarized in Jackendoff (2009; see also Patel 2008), both capacities are human-specific,  
1019 involve the production of sound (though this is not always the case for language: cf. sign  
1020 languages, or written language in literate societies), and have multiple culture-specific variants.

1021 Furthermore, language and music are intertwined in songs, which appear to be a cultural  
1022 universal (e.g., Brown 1991; Nettl 2015; see Mehr et al. 2019 for empirical support; see Norman-  
1023 Haignere et al. 2021 for evidence of neural selectivity for songs in the auditory cortex).

1024 However, Jackendoff (2009) notes that i) most cognitive capacities / mechanisms that have been  
1025 argued to be common to language and music are not *uniquely* shared by language and music, and  
1026 ii) language and music differ in several critical ways, and these differences are important to

1027 consider alongside potential similarities when theorizing about possible shared representations  
1028 and computations.

1029

1030 To elaborate on the first point: the cognitive capacity that has perhaps received the most attention  
1031 in discussions of cognitive and neural mechanisms that may be shared by language and music is  
1032 the combinatorial capacity of the two domains (e.g., Riemann 1877, as cited in Swain 1995;  
1033 Lindblom and Sundberg 1969; Fay 1971; Sundberg and Lindblom 1976; Lerdahl and Jackendoff  
1034 1977, 1983; Roads 1979; Krumhansl and Keil 1982). In particular, in language, words can be  
1035 combined into complex hierarchical structures to form novel phrases and sentences, and in  
1036 music, notes and chords can similarly be combined to form novel melodies. Further, in both  
1037 domains, the combinatorial process is constrained by a set of conventions. However, this  
1038 capacity can be observed, in some form, in many other domains, from visual processing, to math,  
1039 to social cognition, to motor planning, to general reasoning. Similarly, other cognitive capacities  
1040 that are necessary to process language and music—including a large long-term memory store for  
1041 previously encountered elements and patterns, a working memory capacity needed to integrate  
1042 information as it comes in, an ability to form expectations about upcoming elements, and an  
1043 ability to engage in joint action—are important for information processing in other domains. An  
1044 observation that some mental capacity is necessary for multiple domains is compatible with at  
1045 least two architectures: one where the relevant capacity is implemented (perhaps in a similar  
1046 way) in each relevant set of domain-specific circuits, and another where the relevant capacity is  
1047 implemented in a centralized mechanism that all domains draw on (e.g., Fedorenko and Shain  
1048 2021). Those arguing for overlap between language and music processing advocate a version of  
1049 the latter. Critically, any shared mechanism that language and music would draw on should also

1050 support information processing in other domains that require the relevant computation (see  
1051 Section 3 below for arguments against this kind of architecture). (A possible exception,  
1052 according to Jackendoff (2009), may be the fine-scale vocal motor control that is needed for  
1053 speech and vocal music production (cf. sign language or instrumental music), but not any other  
1054 behaviors, but this kind of ability is implemented outside of the core high-level language system,  
1055 in the network of brain areas that support articulation (e.g., Basilakos et al. 2015; Guenter  
1056 2016).)

1057

1058 More importantly, aside from the similarities that have been noted between language and music,  
1059 numerous differences characterize the two domains. Most notable are their different functions.  
1060 Language enables humans to express propositional meanings, and thus to share thoughts with  
1061 one another. The function of music has long been debated (e.g., Darwin 1871; Pinker 1994; see  
1062 e.g., McDermott 2008 and Mehr et al. 2020, for a summary of key ideas), but most proposed  
1063 functions have to do with emotional or affective processing, often with a social component<sup>1</sup>  
1064 (Jackendoff 2009; Savage et al. 2020). If function drives the organization of the brain (and  
1065 biological systems more generally; e.g., Rueffler et al. 2012) by imposing particular  
1066 computational demands on each domain (e.g., Mehr et al. 2020), these fundamentally different  
1067 functions of language and music provide a theoretical reason to expect cognitive and neural  
1068 separation between them. Besides, even the components of language and music that appear  
1069 similar on the surface (e.g., combinatorial processing) differ in deep and important ways (e.g.,  
1070 Patel 2008; Jackendoff 2009; Slevc 2009; Temperley 2022).

---

<sup>1</sup> Although some have discussed the notions of ‘meaning’ in music (e.g., Meyer 1961; Raffman 1993; Cross and Tolbert 2009; Koelsch 2001), it is uncontroversial that music cannot be used to express propositional thought (for discussion, see Patel 2008; Jackendoff 2009; Slevc 2009).

1071

1072 ***2. Functional selectivity of the language network.***

1073

1074 The current results add to the growing body of evidence that the left-lateralized fronto-temporal

1075 brain network that supports language processing is highly selective for linguistic input (e.g.,

1076 Fedorenko et al. 2011; Monti et al. 2009, 2012; Deen et al. 2015; Pritchett et al. 2018; Jouravlev

1077 et al. 2019; Ivanova et al. 2020, 2021; Benn, Ivanova et al. 2021; Liu et al. 2020; Deen and

1078 Freiwald 2021; Paunov et al. 2022; Sueoka et al. 2022; see Fedorenko and Blank 2020 for a

1079 review) and not critically needed for many forms of complex cognition (e.g., Lecours and

1080 Joannette 1980; Varley and Siegal 2000; Varley et al. 2005; Apperly et al. 2006; Woolgar et al.

1081 2018; Ivanova et al. 2021; see Fedorenko and Varley 2016 for a review). Importantly, this

1082 selectivity holds across all components of the language network, including the parts that fall

1083 within ‘Broca’s area’ in the left inferior frontal gyrus. As discussed in the introduction, many

1084 claims about shared structure processing in language and music have focused specifically on

1085 Broca’s area (e.g., Patel 2003; Fadiga et al. 2009; Fitch and Martins 2014). The evidence

1086 presented here shows that the language-responsive parts of Broca’s area, which are robustly

1087 sensitive to linguistic syntactic manipulations (e.g., Just et al. 1996; Stromswold et al. 1996;

1088 Ben-Shachar et al. 2003; Caplan et al. 2008; Peelle et al. 2010; Blank et al. 2016; see e.g.,

1089 Friederici 2011 and Hagoort and Indefrey 2014 for meta-analyses), do not respond when we

1090 listen to music and are not sensitive to structure in music. These results rule out the hypothesis

1091 that language and music processing rely on the same mechanism housed in Broca’s area.

1092

1093 It is also worth noting that the very *premise* of the latter hypothesis—of a special relationship  
1094 between Broca’s area and the processing of linguistic syntax (e.g., Caramazza and Zurif 1976;  
1095 Friederici 2018)—has been questioned and overturned. *First*, syntactic processing does not  
1096 appear to be carried out focally, but is instead distributed across the entire language network,  
1097 with all of its regions showing sensitivity to syntactic manipulations (e.g., Fedorenko et al. 2010,  
1098 2020; Pallier et al. 2011; Blank et al. 2016; Shain, Blank et al. 2020; Shain et al. 2022), and with  
1099 damage to different components leading to similar syntactic comprehension deficits (e.g., Caplan  
1100 et al. 1996; Dick et al. 2001; Wilson and Saygin 2004; Mesulam et al. 2014; Mesulam et al.  
1101 2015). And *second*, the language-responsive part of Broca’s area, like other parts of the language  
1102 network, is sensitive to both syntactic processing and word meanings, and even sub-lexical  
1103 structure (Fedorenko et al. 2010, 2012b, 2020; Regev et al. 2021; Shain et al. 2021). The lack of  
1104 segregation between syntactic and lexico-semantic processing is in line with the idea of  
1105 ‘lexicalized syntax’ where the conventions for how words can combine with one another are  
1106 highly dependent on the particular lexical items (e.g., Goldberg 2002; Jackendoff 2002, 2007;  
1107 Sag et al. 2003; Levin and Rappaport-Hovav 2005; Bybee 2010; Jackendoff and Audring 2020),  
1108 and is contra the idea of combinatorial rules that are blind to the content/meaning of the to-be-  
1109 combined elements (e.g., Chomsky 1965, 1995; Fodor 1983; Pinker and Prince 1988; Pinker  
1110 1991, 1999; Pallier et al. 2011).

1111

1112 ***3. Overlap in structure processing in language and music outside of the core language***

1113 ***network?***

1114

1115 We have here focused on the core fronto-temporal language network. Could structure processing  
1116 in language and music draw on shared resources elsewhere in the brain? The prime candidate is  
1117 the domain-general executive control, or Multiple Demand (MD), network (e.g., Duncan and  
1118 Owen 2000; Duncan 2001, 2010; Assem et al. 2020), which supports functions like working  
1119 memory and inhibitory control. Indeed, according to Patel’s Shared Structural Integration  
1120 Resource Hypothesis (SSIRH; 2003, 2008, 2012), language and music draw on separate  
1121 representations, stored in distinct cortical areas, but rely on the same working memory store to  
1122 integrate incoming elements into evolving structures. Relatedly, Slevc et al. (2013; see Asano et  
1123 al. 2021 for a related proposal) have argued that another executive resource—inhibitory  
1124 control—may be required for structure processing in both language and music. Although it is  
1125 certainly possible that some aspects of linguistic and/or musical processing would require  
1126 domain-general executive resources, based on the available evidence from the domain of  
1127 language, we would argue that any such engagement does not reflect the engagement of  
1128 computations like syntactic structure building. In particular, Blank and Fedorenko (2017) found  
1129 that activity in the brain regions of the domain-general MD network does not closely ‘track’  
1130 linguistic stimuli, as evidenced by low inter-subject correlations during the processing of  
1131 linguistic input (see Paunov et al. 2021 and Sueoka et al. 2022 for replications). Further,  
1132 Diachek, Blank, Siegelman et al. (2020) showed in a large-scale fMRI investigation that the MD  
1133 network is not engaged during language processing in the absence of secondary task demands  
1134 (cf. the core language network, which is relatively insensitive to task demands and responds  
1135 robustly even during passive listening/reading). And Shain, Blank et al. (2020; also, Shain et al.  
1136 2022) have shown that the language network, but not the MD network, is sensitive to linguistic  
1137 surprisal and working-memory integration costs (see also Wehbe et al. 2021 for evidence that



1138 activity in the language, but not the MD, network reflects general incremental processing  
1139 difficulty).

1140

1141 In tandem, this evidence argues against the role of executive resources in core linguistic  
1142 computations like those related to lexical access and combinatorial processing, including  
1143 syntactic parsing and semantic composition (see also Hasson et al. 2015 and Dasgupta and  
1144 Gershman 2021 for general arguments against the separation between memory and computation  
1145 in the brain). Thus, although the contribution of executive resources to music processing  
1146 deserves further investigation (cf. <https://osf.io/68y7c/> for evidence of low responses of the MD  
1147 network to the music conditions in the current study), any overlap within the executive system  
1148 between linguistic and music processing cannot reflect core linguistic computations, as those  
1149 seem to be carried out by the language network (see Fedorenko and Shain 2021, for a review).

1150 Functionally identifying the MD network in individual participants (e.g., Fedorenko et al. 2013;  
1151 Shashidhara et al. 2019) is a powerful way to help interpret the observed effects of music  
1152 manipulations as reflecting general executive demands (see Saxe et al. 2006, Blank et al. 2017  
1153 and Fedorenko 2021, for general discussions of greater interpretability of fMRI results obtained  
1154 from the functional localization approach). Importantly, given the ubiquitous sensitivity of the  
1155 MD network to cognitive demands, it is / will be important to rule out task demands, rather than  
1156 stimulus processing, as the source of overlap between music and language processing in  
1157 interpreting past studies and designing future ones.

1158

1159 ***4. Overlap between music processing and other aspects of speech / language.***

1160

1161 The current study investigated the role of the language network—which supports ‘high-level’  
1162 comprehension and production—in music processing. As a result, the claims we make are  
1163 restricted to those aspects of language that are supported by this network. These include the  
1164 processing of word meanings and combinatorial (syntactic and semantic) processing, but exclude  
1165 speech perception, prosodic processing, higher-level discourse structure building, and at least  
1166 some aspects of pragmatic reasoning. Some of these components of language (e.g., pragmatic  
1167 reasoning) seem *a priori* unlikely to share resources with music. Others (e.g., speech perception)  
1168 have been shown to robustly dissociate from music (Norman-Haignere et al. 2015; Overath et al.  
1169 2015; Kell et al. 2018; Boebinger et al. 2021). However, some components of speech and  
1170 language may, and some do, draw on the same resources as aspects of music. For example,  
1171 aspects of pitch perception have been argued to overlap between speech and music based on  
1172 behavioral and neuropsychological evidence (e.g., Wong and Perrachione 2007; Perrachione et  
1173 al. 2013; Patel et al. 2008b). Indeed, brain regions that selectively respond to different kinds of  
1174 pitched sounds have been previously reported (Patterson et al. 2002; Penagos et al. 2004;  
1175 Norman-Haignere et al. 2013, 2015). Some studies have also suggested that music training may  
1176 improve general rapid auditory processing and pitch encoding that are important for speech  
1177 perception and language comprehension (e.g., Overy 2003; Tallal and Gaab 2006; Wong et al.  
1178 2007), although at least some of these effects likely originate in the brainstem and subcortical  
1179 auditory regions (e.g., Wong et al. 2007). Other aspects of high-level auditory perception,  
1180 including aspects of rhythm, may turn out to overlap as well, and deserve further investigation  
1181 (see Patel 2008, for a review).

1182

1183 We also have focused on Western tonal instrumental music here. In the future, it would be useful  
1184 to extend these findings to more diverse kinds of music. That said, given that individuals are  
1185 most sensitive to structure in music with which they have experience (e.g., Cuddy et al. 1981;  
1186 Cohen 1982; Curtis and Barucha 2009), it seems unlikely that music from less familiar traditions  
1187 would elicit a strong response in the language areas (see Boebinger 2021, for evidence that  
1188 music-selective areas of the auditory cortex respond to culturally diverse music styles). Further,  
1189 given that evolutionarily early forms of music were likely vocal (e.g., Trehub 2003; Mehr 2017),  
1190 it would be useful to examine the responses of the language regions to vocal music without  
1191 linguistic content, like humming or whistling. Based on preliminary unpublished data from our  
1192 lab (available upon request), responses to such stimuli in the language areas appear low.

1193

1194 In conclusion, we have here provided extensive evidence against the role of the language  
1195 network in music perception, including the processing of music structure. Although the  
1196 relationship between music and aspects of speech and language will likely continue to generate  
1197 interest in the research community, and aspects of speech and language other than those  
1198 implemented in the core fronto-temporal language-selective network (Fedorenko et al. 2011;  
1199 Fedorenko and Thompson-Schill 2014) may indeed share some processing resources with  
1200 (aspects of) music, we hope that the current study helps bring clarity to the debate about structure  
1201 processing in language and music.

1202

1203

1204

1205

1206 **Data availability**

1207

1208 The datasets generated during and/or analyzed during the current study are available in the OSF  
1209 repository: <https://osf.io/68y7c/>.

1210

1211

1212 **Code availability**

1213

1214 Scripts for statistical analysis are available at: <https://osf.io/68y7c/>.

1215

1216

1217 **Acknowledgements**

1218

1219 We would like to acknowledge the Athinoula A. Martinos Imaging Center at the McGovern  
1220 Institute for Brain Research at MIT, and its support team (Steve Shannon and Atsushi  
1221 Takahashi). We thank former and current EvLab members for their help with fMRI data  
1222 collection (especially Meilin Zhan for help with Experiment 4). We thank Josh McDermott for  
1223 input on many aspects of this work, Jason Rosenberg for composing the melodies used in  
1224 Experiments 2 and 3, and Zuzanna Balewski for help with creating the final materials used in  
1225 Experiments 2 and 3. For Experiment 3, we thank Vitor Zimmerer for help with creating the  
1226 grammaticality judgment task, Ted Gibson for help with collecting the control data, and Anya  
1227 Ivanova for help with Figure 2. For Experiment 4, we thank Anne Cutler, Peter Graff, Morris  
1228 Alper, Xiaoming Wang, Taibo Li, Terri Scott, Jeanne Gallée, and Lauren Clemens for help with  
1229 constructing and/or recording and/or editing the language materials, and Fatemeh Khalilifar,

1230 Caitlyn Hoeflin, and Walid Bendris for help with selecting the music materials and with the  
 1231 experimental script. Finally, we thank the audience at the Society for Neuroscience conference  
 1232 (2014), the Neurobiology of Language conference (virtual edition, 2020), Ray Jackendoff, Dana  
 1233 Boebinger, and members of the Fedorenko and Gibson labs for helpful comments and  
 1234 discussions. RR was supported by NIH award F32-DC-015163. SNH was supported by a  
 1235 graduate NSF award, as well as postdoctoral awards from the HHMI / Life Sciences research  
 1236 foundation and a K99/R00 award from the NIH (1K99DC018051-01A1). SMM was supported  
 1237 by a La Caixa fellowship LCF/BQ/AA17/11610043. RV was supported by Alzheimer’s Society  
 1238 and The Stroke Association. EF was supported by the R00 award HD057522, R01 awards  
 1239 DC016607, DC016950, and NS121471, by the Paul and Lilah Newton Brain Science Award, and  
 1240 funds from the Brain and Cognitive Sciences department, the McGovern Institute for Brain  
 1241 Research, and the Simons Center for the Social Brain.

1242

1243 **Author contributions:**

1244

|                                           | XC                                  | JA                                  | RR                                  | TR                                  | SNH                                 | OJ                                  | SMM                                 | HK                                  | RV†                                 | EF†                                 |
|-------------------------------------------|-------------------------------------|-------------------------------------|-------------------------------------|-------------------------------------|-------------------------------------|-------------------------------------|-------------------------------------|-------------------------------------|-------------------------------------|-------------------------------------|
| Conceptualization                         |                                     |                                     |                                     |                                     |                                     |                                     |                                     |                                     | <input checked="" type="checkbox"/> | <input checked="" type="checkbox"/> |
| Methodology                               | <input checked="" type="checkbox"/> |                                     |                                     | <input checked="" type="checkbox"/> | <input checked="" type="checkbox"/> |                                     |                                     |                                     | <input checked="" type="checkbox"/> | <input checked="" type="checkbox"/> |
| Software                                  | <input checked="" type="checkbox"/> | <input checked="" type="checkbox"/> |                                     |                                     |                                     |                                     |                                     |                                     |                                     |                                     |
| Investigation                             | <input checked="" type="checkbox"/> | <input checked="" type="checkbox"/> | <input checked="" type="checkbox"/> |                                     |                                     | <input checked="" type="checkbox"/> | <input checked="" type="checkbox"/> | <input checked="" type="checkbox"/> | <input checked="" type="checkbox"/> | <input checked="" type="checkbox"/> |
| Investigation:<br>fMRI data<br>collection | <input checked="" type="checkbox"/> | <input checked="" type="checkbox"/> |                                     |                                     |                                     | <input checked="" type="checkbox"/> |                                     |                                     |                                     | <input checked="" type="checkbox"/> |

|                                                              |                                     |                                     |                                     |                                     |                                     |                                     |                                     |                                     |                                     |                                     |
|--------------------------------------------------------------|-------------------------------------|-------------------------------------|-------------------------------------|-------------------------------------|-------------------------------------|-------------------------------------|-------------------------------------|-------------------------------------|-------------------------------------|-------------------------------------|
| Investigation:<br>fMRI data<br>preprocessing and<br>analysis | <input checked="" type="checkbox"/> | <input checked="" type="checkbox"/> |                                     |                                     |                                     | <input checked="" type="checkbox"/> | <input checked="" type="checkbox"/> | <input checked="" type="checkbox"/> |                                     |                                     |
| Investigation:<br>Behavioral data<br>collection              | <input checked="" type="checkbox"/> |                                     | <input checked="" type="checkbox"/> |                                     |                                     |                                     |                                     |                                     | <input checked="" type="checkbox"/> |                                     |
| Investigation:<br>Behavioral data<br>analysis                |                                     |                                     | <input checked="" type="checkbox"/> |                                     |                                     |                                     |                                     |                                     | <input checked="" type="checkbox"/> | <input checked="" type="checkbox"/> |
| Formal statistical<br>analysis                               | <input checked="" type="checkbox"/> |                                     | <input checked="" type="checkbox"/> |                                     |                                     |                                     |                                     |                                     |                                     | <input checked="" type="checkbox"/> |
| Validation                                                   | <input checked="" type="checkbox"/> |                                     | <input checked="" type="checkbox"/> |                                     |                                     |                                     |                                     |                                     |                                     |                                     |
| Visualization                                                | <input checked="" type="checkbox"/> |                                     | <input checked="" type="checkbox"/> | <input checked="" type="checkbox"/> |                                     |                                     |                                     |                                     |                                     |                                     |
| Writing: Original<br>draft                                   | <input checked="" type="checkbox"/> |                                     | <input checked="" type="checkbox"/> |                                     |                                     |                                     |                                     |                                     | <input checked="" type="checkbox"/> | <input checked="" type="checkbox"/> |
| Writing: Editing<br>+ comments                               |                                     | <input checked="" type="checkbox"/> |                                     | <input checked="" type="checkbox"/> | <input checked="" type="checkbox"/> | <input checked="" type="checkbox"/> | <input checked="" type="checkbox"/> | <input checked="" type="checkbox"/> |                                     |                                     |
| Resources                                                    |                                     |                                     |                                     |                                     |                                     |                                     |                                     |                                     | <input checked="" type="checkbox"/> | <input checked="" type="checkbox"/> |
| Project<br>administration;<br>overall<br>supervision         |                                     |                                     |                                     |                                     |                                     |                                     |                                     |                                     |                                     | <input checked="" type="checkbox"/> |

1245

1246 **Conflict of interest**

1247 The authors declare no competing financial interests.

1248 **References**

1249 Alcock KJ, Wade D, Anslow P, Passingham RE. 2000. Pitch and timing abilities in adult left-  
1250 hemisphere-dysphasic and right-hemisphere-damaged subjects. *Brain Lang.* 75(1):47-65.

1251

1252 Amalric M, Dehaene S. 2018. Cortical circuits for mathematical knowledge: evidence for a  
1253 major subdivision within the brain's semantic networks. *Philos Trans R Soc Lond B Biol Sci.*  
1254 373(1740):20160515.

1255

1256 Apperly IA, Samson D, Carroll N, Hussain S, Humphreys G. 2006. Intact first-and second-order  
1257 false belief reasoning in a patient with severely impaired grammar. *Soc Neurosci.* 1(3-4):334-  
1258 348.

1259

1260 Asano R, Boeckx C, Seifert U. 2021. Hierarchical control as a shared neurocognitive mechanism  
1261 for language and music. *Cognition.* 216:104847.

1262

1263 Assem M, Glasser MF, Van Essen DC, Duncan J. 2020. A domain-general cognitive core  
1264 defined in multimodally parcellated human cortex. *Cereb Cortex.* 30(8):4361-4380.

1265

1266 Baillet S. 2014. Forward and Inverse Problems of MEG/EEG. In: Jaeger D, Jung R, editors.  
1267 Encyclopedia of Computational Neuroscience. New York (NY): Springer. p.1-8.

1268

1269 Baroni M, Maguire S, Drabkin W. 1983. The concept of musical grammar. *Music Anal,*  
1270 2(2):175-208.



1271

1272 Basilakos A, Rorden C, Bonilha L, Moser D, Fridriksson J. 2015. Patterns of poststroke brain damage  
1273 that predict speech production errors in apraxia of speech and aphasia dissociate. *Stroke*. 46(6):1561-  
1274 1566.

1275

1276 Basso A, Capitani E. 1985. Spared musical abilities in a conductor with global aphasia and  
1277 ideomotor apraxia. *J Neurol Neurosurg Psychiatry*. 48(5):407-412.

1278

1279 Bates D, Mächler M, Bolker B, Walker S. 2015. Fitting linear mixed-effects models using lme4.  
1280 *J Stat Softw*. 67(1):1–48.

1281

1282 Bautista A, Wilson SM. 2016. Neural responses to grammatically and lexically degraded speech.  
1283 *Lang Cogn Neurosci*. 31(4):567-574.

1284

1285 Ben-Shachar M, Hendler T, Kahn I, Ben-Bashat D, Grodzinsky Y. 2003. The neural reality of  
1286 syntactic transformations: Evidence from functional magnetic resonance imaging. *Psychol Sci*.  
1287 14(5):433-440.

1288

1289 Benn Y\*, Ivanova A\*, Clark O, Mineroff Z, Seikus C, Santos Silva J, Varley R^, Fedorenko E^.  
1290 2021. No evidence for a special role of language in feature-based categorization. *bioRxiv*.

1291

1292 Bernstein L. 1976. The unanswered question: Six talks at Harvard. Cambridge (MA): Harvard  
1293 University Press.

1294

- 1295 Bidelman GM, Gandour JT, Krishnan A. 2011. Musicians and tone-language speakers share  
1296 enhanced brainstem encoding but not perceptual benefits for musical pitch. *Brain Cogn.* 77(1):1-  
1297 10.
- 1298
- 1299 Bigand E, Tillmann B, Poulin B, D'Adamo DA, Madurell F. 2001. The effect of harmonic  
1300 context on phoneme monitoring in vocal music. *Cognition.* 81(1):B11-B20.
- 1301
- 1302 Bigand E, Delbé C, Poulin-Charronnat B, Leman M, Tillmann B. 2014. Empirical evidence for  
1303 musical syntax processing? Computer simulations reveal the contribution of auditory short-term  
1304 memory. *Front Syst Neurosci.* 8:94.
- 1305
- 1306 Bishop DVM, Norbury CF. 2002. Exploring the borderlands of autistic disorder and specific  
1307 language impairment: a study using standardised diagnostic instruments. *J Child Psychol*  
1308 *Psychiatry.* 43(7):917-929.
- 1309
- 1310 Blank I, Kanwisher N, Fedorenko E. 2014. A functional dissociation between language and  
1311 multiple-demand systems revealed in patterns of BOLD signal fluctuations. *J Neurophysiol.*  
1312 112(5):1105-1118.
- 1313
- 1314 Blank I, Balewski Z, Mahowald K, Fedorenko E. 2016. Syntactic processing is distributed across  
1315 the language system. *Neuroimage.* 127:307-323.
- 1316

- 1317 Blank IA, Fedorenko E. 2017. Domain-general brain regions do not track linguistic input as  
1318 closely as language-selective regions. *J Neurosci*. 37(41):9999-10011.  
1319
- 1320 Blank IA, Kiran S, Fedorenko E. 2017. Can neuroimaging help aphasia researchers? Addressing  
1321 generalizability, variability, and interpretability. *Cogn Neuropsychol*, 34(6):377-393.  
1322
- 1323 Boebinger D, Norman-Haignere SV, McDermott JH, Kanwisher N. 2021. Music-selective neural  
1324 populations arise without musical training. *J Neurophysiol*, 125(6):2237-2263.  
1325
- 1326 Boilès CL. 1973. Reconstruction of proto-melody. *Anuario Interamericano de Investigacion*  
1327 *Musical*, 9:45-63.  
1328
- 1329 Bortolini U, Leonard LB, Caselli MC. 1998. Specific Language Impairment in Italian and  
1330 English: evaluating alternative accounts of grammatical deficits. *Lang Cogn Process*. 13(1):1-20.  
1331
- 1332 Braga RM, DiNicola LM, Becker HC, Buckner RL. 2020. Situating the left-lateralized language  
1333 network in the broader organization of multiple specialized large-scale distributed networks. *J*  
1334 *Neurophysiol*. 124(5):1415-1448.  
1335
- 1336 Brown DR. 1991. *Human Universals*. Philadelphia (PA):Temple University Press.  
1337
- 1338 Brust JC. 1980. Music and language: musical alexia and agraphia. *Brain*. 103(2):367-392.  
1339

- 1340 Brysbaert M, Stevens M. 2018. Power analysis and effect size in mixed effects models: A  
1341 tutorial. *J Cogn.* 1(1):9.  
1342
- 1343 Bybee J. 2010. *Language, usage and cognition*. Cambridge (UK): Cambridge University Press.  
1344
- 1345 Caplan D, Hildebrandt N, Makris N. 1996. Location of lesions in stroke patients with deficits in  
1346 syntactic processing in sentence comprehension. *Brain.* 119(3):933-949.  
1347
- 1348 Caplan D, Stanczak L, Waters G. 2008. Syntactic and thematic constraint effects on blood  
1349 oxygenation level dependent signal correlates of comprehension of relative clauses. *J Cogn  
1350 Neurosci.* 20(4):643-656.  
1351
- 1352 Caramazza A, Zurif EB. 1976. Dissociation of algorithmic and heuristic processes in language  
1353 comprehension: Evidence from aphasia. *Brain Lang.* 3(4):572-582.  
1354
- 1355 Chen G, Taylor PA, Cox RW. 2017. Is the statistic value all we should care about in  
1356 neuroimaging?. *Neuroimage.* 147:952-959.  
1357
- 1358 Chiappetta B, Patel AD, Thompson CK. 2022. Musical and linguistic syntactic processing in  
1359 agrammatic aphasia: An ERP study. *J Neurolinguistics.* 62:101043.  
1360
- 1361 Chomsky N. 1965. *Aspects of the Theory of Syntax*. Cambridge (MA): MIT press.  
1362

- 1363 Chomsky N. 1995. The minimalist program. Cambridge (MA): MIT Press.
- 1364
- 1365 Collins T, Tillmann B, Barrett FS, Delbé C, Janata P. 2014. A combined model of sensory and  
1366 cognitive representations underlying tonal expectations in music: from audio signals to behavior.  
1367 *Psychol Rev*, 121(1):33.
- 1368
- 1369 Cooke A, Grossman M, DeVita C, Gonzalez-Atavales J, Moore P, Chen W, Gee J, Detre J. 2006.  
1370 Large-scale neural network for sentence processing. *Brain Lang*, 96(1):14-36.
- 1371
- 1372 Cooper R. 1973. Propositions pour un modele transformationnel de description musicale.  
1373 *Musique en Jeu*. 10:70-88.
- 1374
- 1375 Corbetta M, Shulman GL. 2002. Control of goal-directed and stimulus-driven attention in the  
1376 brain. *Nat Rev Neurosci*. 3(3):201-215.
- 1377
- 1378 Corlett PR, Mollick JA, Kober H. 2021. Substrates of Human Prediction Error for Incentives,  
1379 Perception, Cognition, and Action. psyarxiv.
- 1380
- 1381 Crawford JR, Garthwaite PH. 2007. Comparison of a single case to a control or normative  
1382 sample in neuropsychology: Development of a Bayesian approach. *Cogn Neuropsychol*. 24(4),  
1383 343–372.
- 1384

- 1385 Creel SC, Weng M, Fu G, Heyman GD, Lee K. 2018. Speaking a tone language enhances  
1386 musical pitch perception in 3–5-year-olds. *Dev Sci.* 21(1): e12503.  
1387
- 1388 Crump MJ, McDonnell JV, Gureckis TM. 2013. Evaluating Amazon's Mechanical Turk as a tool  
1389 for experimental behavioral research. *PLoS One.* 8(3):e57410.  
1390
- 1391 Cohen AJ. 1982. Exploring the sensitivity to structure in music. *Can Univ Music Rev.* 3:15-30.  
1392
- 1393 Cuddy LL, Cohen AI, Mewhort DJK. 1981. Perception of structure in short melodic sequences. *J Exp*  
1394 *Psychol Hum Percept Perform.* 7:869-883.  
1395
- 1396 Cumming G. 2012. *Understanding the new statistics: Effect sizes, confidence intervals, and*  
1397 *meta-analysis.* New York (NY): Taylor & Francis.  
1398
- 1399 Curtis ME, Bharucha JJ. 2009. Memory and musical expectation for tones in cultural context. *Music*  
1400 *Percept.* 26:365–375.  
1401
- 1402 Dale AM. 1999. Optimal experimental design for event-related fMRI. *Hum Brain Mapp.* 8(2-  
1403 3):109-114.  
1404
- 1405 Darwin C. 1871. *The Descent of Man, and Selection in Relation to Sex.* London (UK): John  
1406 Murray.  
1407

- 1408 Dasgupta I, Gershman SJ. 2021. Memory as a Computational Resource. *Trends Cogn Sci*,  
1409 25(3):240-251.  
1410
- 1411 Deen B, Koldewyn K, Kanwisher N, Saxe R. 2015. Functional organization of social perception  
1412 and cognition in the superior temporal sulcus. *Cereb Cortex*. 25(11):4596-4609.  
1413
- 1414 Deen B, Freiwald WA. 2021. Parallel systems for social and spatial reasoning within the cortical  
1415 apex. *bioRxiv*.  
1416
- 1417 Deutsch D, Henthorn T, Marvin E, Xu H. 2006. Absolute pitch among American and Chinese  
1418 conservatory students: Prevalence differences, and evidence for a speech-related critical period. *J*  
1419 *Acoust Soc Am*. 119(2):719-722.  
1420
- 1421 Deutsch D, Dooley K, Henthorn T, Head B. 2009. Absolute pitch among students in an  
1422 American music conservatory: Association with tone language fluency. *J Acoust Soc Am*.  
1423 125(4):2398-2403.  
1424
- 1425 Diachek E\*, Blank I\*, Siegelman M\*, Affourtit J, Fedorenko E. 2020. The domain-general  
1426 multiple demand (MD) network does not support core aspects of language comprehension: a  
1427 large-scale fMRI investigation. *J Neurosci*. 40(23):4536–4550.  
1428

1429 Dick F, Bates E, Wulfeck B, Utman JA, Dronkers N, Gernsbacher MA. 2001. Language deficits,  
1430 localization, and grammar: evidence for a distributive model of language breakdown in aphasic  
1431 patients and neurologically intact individuals. *Psychol Rev*, 108(4):759-788.

1432

1433 Ding J, Martin RC, Hamilton AC, Schnur TT. (2020). Dissociation between frontal and  
1434 temporal-parietal contributions to connected speech in acute stroke. *Brain*. 143(3), 862-876.

1435

1436 Duncan J, Owen AM. 2000. Common regions of the human frontal lobe recruited by diverse  
1437 cognitive demands. *Trends Neurosci*. 23(10):475-483.

1438

1439 Duncan J. 2001. An adaptive coding model of neural function in prefrontal cortex. *Nat Rev*  
1440 *Neurosci*. 2(11):820-829.

1441

1442 Duncan J. 2010. The multiple-demand (MD) system of the primate brain: mental programs for  
1443 intelligent behaviour. *Trends Cogn Sci*. 14(4):172-179.

1444

1445 Duncan J. 2013. The structure of cognition: attentional episodes in mind and brain. *Neuron*.  
1446 80(1):35-50.

1447

1448 Embick D, Marantz A, Miyashita Y, O'Neil W, Sakai KL. 2000. A syntactic specialization for  
1449 Broca's area. *Proc Natl Acad Sci USA*, 97(11):6150-6154.

1450



- 1451 Fadiga L, Craighero L, D'Ausilio A. 2009. Broca's area in language, action, and music. *Ann N Y*  
1452 *Acad Sci.* 1169(1):448-458.  
1453
- 1454 Fancourt A. 2013. Exploring musical cognition in children with Specific Language Impairment.  
1455 Doctoral thesis, Goldsmiths, University of London.  
1456
- 1457 Faroqi-Shah Y, Slevc LR, Saxena S, Fisher SJ, Pifer M. 2020. Relationship between musical and  
1458 language abilities in post-stroke aphasia. *Aphasiology.* 34(7):793-819.  
1459
- 1460 Fay T. 1971. Perceived hierarchic structure in language and music. *J Music Theory.* 15(1/2):112-  
1461 137.  
1462
- 1463 Fedorenko E, Patel A, Casasanto D, Winawer J, Gibson E. 2009. Structural integration in  
1464 language and music: Evidence for a shared system. *Mem Cognit,* 37(1):1-9.  
1465
- 1466 Fedorenko E, Hsieh P-J, Nieto-Castañon A, Whitfield-Gabrieli S, Kanwisher N. 2010. A new  
1467 method for fMRI investigations of language: Defining ROIs functionally in individual subjects. *J*  
1468 *Neurophysiol.* 104(2):1177-94.  
1469
- 1470 Fedorenko E, Behr M, Kanwisher N. 2011. Functional specificity for high-level linguistic  
1471 processing in the human brain. *Proc Natl Acad Sci USA.* 108(39):16428-16433.  
1472

- 1473 Fedorenko E, Duncan J, Kanwisher N. 2012a. Language-selective and domain-general regions  
1474 lie side by side within Broca's area. *Curr Biol.* 22(21):2059-2062.  
1475
- 1476 Fedorenko E, Nieto-Castañon A, Kanwisher N. 2012b. Lexical and syntactic representations in  
1477 the brain: An fMRI investigation with multi-voxel pattern analyses. *Neuropsychologia.*  
1478 50(4):499-513.  
1479
- 1480 Fedorenko E, McDermott J, Norman-Haignere S, Kanwisher N. 2012c. Sensitivity to musical  
1481 structure in the human brain. *J Neurophysiol.* 108(12):3289-3300.  
1482
- 1483 Fedorenko E, Duncan J, Kanwisher N. 2013. Broad domain-generalty in focal regions of frontal  
1484 and parietal cortex. *Proc Natl Acad Sci USA.* 110(41):16616-16621.  
1485
- 1486 Fedorenko E. 2014. The role of domain-general cognitive control in language comprehension.  
1487 *Front Psychol.* 5:335.  
1488
- 1489 Fedorenko E, Thompson-Schill SL. 2014. Reworking the language network. *Trends Cogn Sci.*  
1490 18(3):120-126.  
1491
- 1492 Fedorenko E, Varley, R. 2016. Language and thought are not the same thing: Evidence from  
1493 neuroimaging and neurological patients. *Ann N Y Acad Sci.* 1369(1):132-153.  
1494

- 1495 Fedorenko E, Blank I. 2020. Broca's Area Is Not a Natural Kind. *Trends Cogn Sci.* 24(4):270-  
1496 284.  
1497
- 1498 Fedorenko E, Blank I, Siegelman M, Mineroff Z. 2020. Lack of selectivity for syntax relative to  
1499 word meanings throughout the language network. *Cognition.* 203:104348.  
1500
- 1501 Fedorenko E. 2020. The brain network that supports high-level language processing. In  
1502 Gazzaniga M, Ivry RB, Mangun GR, editors. *Cognitive Neuroscience: The Biology of the Mind*  
1503 (5th edition). New York (NY): WW Norton and Company.  
1504
- 1505 Fedorenko E. 2021. The early origins and the growing popularity of the individual-subject  
1506 analytic approach in human neuroscience. *Curr Opin Behav Sci.* 40:105-112.  
1507
- 1508 Fedorenko E, Shain C. 2021. Similarity of computations across domains does not imply shared  
1509 implementation: The case of language comprehension. *Curr Dir Psychol Sci.* 30(6):526-534.  
1510
- 1511 Fischl B, Rajendran N, Busa E, Augustinack J, Hinds O, Yeo BT, Mohlberg H, Amunts K, Zilles  
1512 K. 2008. Cortical folding patterns and predicting cytoarchitecture. *Cereb Cortex.* 18(8):1973-  
1513 1980.  
1514
- 1515 Fitch WT, Martins MD. 2014. Hierarchical processing in music, language, and action: Lashley  
1516 revisited. *Ann N Y Acad Sci.* 1316(1):87-104.  
1517

- 1518 Fodor JD. 1983. Phrase structure parsing and the island constraints. *Linguist Philos.* 6(2):163-  
1519 223.  
1520
- 1521 Fouragnan E, Retzler C, Philiastides MG. 2018. Separate neural representations of prediction  
1522 error valence and surprise: Evidence from an fMRI meta-analysis. *Hum Brain Mapp.*  
1523 39(7):2887-2906.  
1524
- 1525 Franklin S, Turner JE, Ellis AW. 1992. ADA Comprehension Battery. York (UK): University of  
1526 York.  
1527
- 1528 Friederici AD, Fiebach CJ, Schlesewsky M, Bornkessel ID, Von Cramon DY. 2006. Processing  
1529 linguistic complexity and grammaticality in the left frontal cortex. *Cereb Cortex.* 16(12):1709-  
1530 1717.  
1531
- 1532 Friederici AD, Kotz SA, Scott SK, Obleser J. 2010. Disentangling syntax and intelligibility in  
1533 auditory language comprehension. *Hum Brain Mapp.* 31(3):448-457.  
1534
- 1535 Friederici AD. 2011. The brain basis of language processing: from structure to function. *Physiol*  
1536 *Rev.* 91(4):1357-1392.  
1537
- 1538 Friederici AD. 2018. The neural basis for human syntax: Broca's area and beyond. *Curr Opin*  
1539 *Behav Sci.* 21:88-92.  
1540

- 1541 Frost MA, Goebel R. 2012. Measuring structural–functional correspondence: spatial variability  
1542 of specialised brain regions after macro-anatomical alignment. *Neuroimage* 59(2):1369-1381.  
1543
- 1544 Giesbrecht F, Burns J. 1985. Two-Stage Analysis Based on a Mixed Model: Large-Sample  
1545 Asymptotic Theory and Small-Sample Simulation Results. *Biometrics*. 41(2):477-486.  
1546
- 1547 Goldberg AE. 2002. Construction Grammar. In: Nadel L, editor. *Encyclopedia of Cognitive*  
1548 *Science*. Stuttgart (Germany): Macmillan.  
1549
- 1550 Green DM, Swets JA. 1966. *Signal detection theory and psychophysics*. New York (NY): Wiley.  
1551
- 1552 Guenther FH. 2016. Neural control of speech. Cambridge (MA): MIT Press.  
1553
- 1554 Hagoort P, Indefrey P. 2014. The neurobiology of language beyond single words. *Ann Rev*  
1555 *Neurosci*, 37:347-362.  
1556
- 1557 Hasson U, Chen J, Honey CJ. 2015. Hierarchical process memory: memory as an integral  
1558 component of information processing. *Trends Cogn Sci*. 19(6):304-313.  
1559
- 1560 Herholz SC, Zatorre RJ. 2012. Musical training as a framework for brain plasticity: behavior,  
1561 function, and structure. *Neuron*. 76(3):486-502.  
1562

1563 Herrmann B, Obleser J, Kalberlah C, Haynes JD, Friederici AD. 2012. Dissociable neural  
1564 imprints of perception and grammar in auditory functional imaging. *Hum Brain Mapp.*  
1565 33(3):584-595.  
1566  
1567 Hoch L, Poulin-Charronnat B, Tillmann B. 2011. The influence of task-irrelevant music on  
1568 language processing: syntactic and semantic structures. *Front Psychol.* 2:112.  
1569  
1570 Hrong-Tai Fai A, Cornelius PL. 1996. Approximate F-tests of multiple degree of freedom  
1571 hypotheses in generalized least squares analyses of unbalanced split-plot experiments. *J Stat*  
1572 *Comput Simul.* 54(4):363-378.  
1573  
1574 Ivanova A, Srikant S, Sueoka Y, Kean H, Dhamala R, O'Reilly U-M, Bers MU, Fedorenko E.  
1575 2020. Comprehension of computer code relies primarily on domain-general executive resources.  
1576 *eLife.* 9:e58906.  
1577  
1578 Ivanova A, Mineroff Z, Zimmerer V, Kanwisher N, Varley R, Fedorenko E. 2021. The language  
1579 network is recruited but not required for non-verbal semantic processing. bioRxiv.  
1580  
1581 Jackendoff R. 2002. English particle constructions, the lexicon, and the autonomy of syntax. In  
1582 Dehé N, Jackendoff R, McIntyre A, Urban S, editors. *Verb-particle explorations*. Berlin  
1583 (Germany): De Gruyter. p. 67-94.  
1584

- 1585 Jackendoff R. 2007. A parallel architecture perspective on language processing. *Brain Res.*  
1586 1146:2-22.  
1587
- 1588 Jackendoff R. 2009. Parallels and nonparallels between language and music. *Music Percept.*  
1589 26(3):195-204.  
1590
- 1591 Jackendoff R, Audring J. 2020. The texture of the lexicon: relational morphology and the parallel  
1592 architecture. Oxford (UK): Oxford University Press.  
1593
- 1594 Janata P. 1995. ERP measures assay the degree of expectancy violation of harmonic contexts in  
1595 music. *J Cogn Neurosci.* 7(2):153-164.  
1596
- 1597 Jentschke S, Koelsch S, Sallat S, Friederici AD. 2008. Children with specific language  
1598 impairment also show impairment of music-syntactic processing. *J Cogn Neurosci.* 20(11):1940-  
1599 1951.  
1600
- 1601 Jouravlev O, Zheng D, Balewski Z, Pongos A, Levan Z, Goldin-Meadow S, Fedorenko E. 2019.  
1602 Speech-accompanying gestures are not processed by the language-processing mechanisms.  
1603 *Neuropsychologia.* 132:107132.  
1604
- 1605 Jouravlev O, Kell A, Mineroff Z, Haskins AJ, Ayyash D, Kanwisher N, Fedorenko E. 2020.  
1606 Reduced language lateralization in autism and the broader autism phenotype as assessed with  
1607 robust individual-subjects analyses. *Autism Res.* 13(10):1746-1761.

1608

1609 Just MA, Carpenter PA, Keller TA, Eddy WF, Thulborn KR. 1996. Brain activation modulated  
1610 by sentence comprehension. *Science*. 274(5284):114-116.

1611

1612 Kaplan E, Goodglass H, Weintraub S. 2001. Boston Naming Test. 2nd Ed. Philadelphia (PA):  
1613 Lippincott Williams & Wilkins.

1614

1615 Kay J, Lesser R, Coltheart M. 1992. Psycholinguistic Assessments of Language Processing in  
1616 Aphasia (PALPA). Hove (UK): Lawrence Erlbaum.

1617

1618 Kell AJ, Yamins DL, Shook EN, Norman-Haignere SV, McDermott JH. 2018. A task-optimized  
1619 neural network replicates human auditory behavior, predicts brain responses, and reveals a  
1620 cortical processing hierarchy. *Neuron*. 98(3):630-644.

1621

1622 Keller TA, Carpenter PA, Just MA. 2001. The neural bases of sentence comprehension: a fMRI  
1623 examination of syntactic and lexical processing. *Cereb Cortex*. 11(3):223-237.

1624

1625 Koelsch S, Gunter T, Friederici AD, Schröger E. 2000. Brain indices of music processing:  
1626 “nonmusicians” are musical. *J Cogn Neurosci*. 12(3):520-541.

1627

1628 Koelsch S, Gunter TC, Schröger E, Tervaniemi M, Sammler D, Friederici AD. 2001.  
1629 Differentiating ERAN and MMN: an ERP study. *NeuroReport*. 12(7):1385-1389.

1630



1631 Koelsch S, Gunter TC, von Cramon DY, Zysset S, Lohmann G, Friederici AD. 2002. Bach  
1632 speaks: A cortical " language-network" serves the processing of music. *Neuroimage*. 17(2):956-  
1633 966.  
1634  
1635 Koelsch S. 2006. Significance of Broca's area and ventral premotor cortex for music-syntactic  
1636 processing. *Cortex*. 42(4):518-520.  
1637  
1638 Koelsch S, Jentschke S, Sammler D, Mietchen D. 2007. Untangling syntactic and sensory  
1639 processing: An ERP study of music perception. *Psychophysiology*. 44(3):476-490.  
1640  
1641 Koelsch S, Rohrmeier M, Torrecuso R, Jentschke S. 2013. Processing of hierarchical syntactic  
1642 structure in music. *Proc Natl Acad Sci USA*. 110(38):15443-15448.  
1643  
1644 Kriegeskorte N, Simmons WK, Bellgowan PS, Baker CI. 2009. Circular analysis in systems  
1645 neuroscience: the dangers of double dipping. *Nat Neurosci*. 12(5):535.  
1646  
1647 Krumhansl CL, Keil FC. 1982. Acquisition of the hierarchy of tonal functions in music. *Mem*  
1648 *Cognit*. 10(3):243-251.  
1649  
1650 Kunert R, Slevc LR. 2015. A Commentary on: "Neural overlap in processing music and speech".  
1651 *Front Hum Neurosci*. 9:330.  
1652

- 1653 Kunert R, Willems RM, Casasanto D, Patel AD, Hagoort P. 2015. Music and language syntax  
1654 interact in Broca's area: An fMRI study. *PLoS One*. 10(11):e0141069.  
1655
- 1656 Kunert R, Willems RM, Hagoort P. 2016. Language influences music harmony perception:  
1657 effects of shared syntactic integration resources beyond attention. *R Soc Open Sci*. 3(2):150685.  
1658
- 1659 Kuperberg GR, Holcomb PJ, Sitnikova T, Greve D, Dale AM, Caplan D. 2003. Distinct patterns  
1660 of neural modulation during the processing of conceptual and syntactic anomalies. *J Cogn  
1661 Neurosci*. 15(2):272-293.  
1662
- 1663 Kuznetsova A, Brockhoff PB, Christensen RH. 2017. lmerTest package: tests in linear mixed  
1664 effects models. *J Stat Softw*. 82(13):1-26.  
1665
- 1666 LaCroix A, Diaz AF, Rogalsky C. 2015. The relationship between the neural computations for  
1667 speech and music perception is context-dependent: an activation likelihood estimate study. *Front  
1668 Psychol*. 6:1138.  
1669
- 1670 Lartillot O, Grandjean D. 2019. Tempo and metrical analysis by tracking multiple metrical levels  
1671 using autocorrelation. *Appl Sci*. 9(23):5121.  
1672
- 1673 Lartillot O, Toiviainen P. 2007. September). A Matlab toolbox for musical feature extraction  
1674 from audio. In: Proceedings of the 10th International Conference on Digital Audio Effects; 2007 Sep 10-  
1675 15; Bordeaux, France. p. 244.

1676

1677 Lecours A, Joannette Y. 1980. Linguistic and other psychological aspects of paroxysmal aphasia.

1678 *Brain Lang.* 10(1):1-23.

1679

1680 Lerdahl F, Jackendoff R. 1977. Toward a formal theory of tonal music. *J Music Theory.*

1681 21(1):111-171.

1682

1683 Lerdahl F, Jackendoff R. 1983. An overview of hierarchical structure in music. *Music Percept.*

1684 1(2):229-252.

1685

1686 Levin B, Rappaport-Hovav M. 2005. Argument realization. Cambridge (UK): Cambridge

1687 University Press.

1688

1689 Levitin DJ, Menon V. 2003. Musical structure is processed in “language” areas of the brain: a

1690 possible role for Brodmann Area 47 in temporal coherence. *Neuroimage.* 20(4):2142-2152.

1691

1692 Linebarger MC, Schwartz MF, Saffran EM. 1983. Sensitivity to grammatical structure in so-

1693 called agrammatic aphasics. *Cognition.* 13(3):361-392.

1694

1695 Lindblom B, Sundberg J. 1969. Towards a generative theory of melody. Speech Transmission

1696 Laboratory. *Quarterly Progress and Status Reports.* 10:53-86.

1697

1698 Lipkin B, Tuckute G, Affourtit J, Small H, Mineroff Z, Jouravlev O, Rakocevic L, Pritchett B, et al.  
1699 2022. Probabilistic atlas for the language network based on precision fMRI data from > 800  
1700 individuals. *Sci Data*. 9(1):1-10.  
1701  
1702 Liu YF, Kim J, Wilson C, Bedny M. 2020. Computer code comprehension shares neural  
1703 resources with formal logical inference in the fronto-parietal network. *Elife*. 9:e59340.  
1704  
1705 Liu J, Hilton CB, Bergelson E, Mehr SA. 2021. Language experience shapes music processing  
1706 across 40 tonal, pitch-accented, and non-tonal languages. *bioRxiv*.  
1707  
1708 Luria AR, Tsvetkova LS, Futer DS. 1965. Aphasia in a composer. *J Neurol Sci*. 2(3):288-292.  
1709  
1710 Maess B, Koelsch S, Gunter TC, Friederici AD. 2001. Musical syntax is processed in Broca's  
1711 area: an MEG study. *Nat Neurosci*. 4(5):540-545.  
1712  
1713 Mahowald K, Fedorenko E. 2016. Reliable individual-level neural markers of high-level  
1714 language processing: A necessary precursor for relating neural variability to behavioral and  
1715 genetic variability. *Neuroimage*. 139:74-93.  
1716  
1717 Makowski D. 2018. The psycho Package: An Efficient and Publishing-Oriented Workflow for  
1718 Psychological Science. *J Open Source Softw*. 3(22):470.  
1719

- 1720 Malik-Moraleda S, Ayyash D, Gallée J, Affourtit J, Hoffmann M, Mineroff Z, Jouravlev O,  
1721 Fedorenko E. 2022. An investigation across 45 languages and 12 language families reveals a  
1722 universal language network. *Nat Neurosci.* 25(8):1014-1019.  
1723
- 1724 Marin OSM. 1982. *Neurological Aspects of Music Perception and Performance*. New York  
1725 (NY): Academic Press.  
1726
- 1727 Matchin W, Hickok G. 2020. The cortical organization of syntax. *Cereb Cortex.* 30(3):1481-  
1728 1498.  
1729
- 1730 Mehr SA, Krasnow MM. 2017. Parent-offspring conflict and the evolution of infant-directed  
1731 song. *Evol Hum Behav.* 38(5):674-684.  
1732
- 1733 Mehr SA, Singh M, Knox D, Ketter DM, Pickens-Jones D, Atwood S, Lucas C, Jacoby N, Egner  
1734 AA, Hopkins EJ, et al. (2019). Universality and diversity in human song. *Science.*  
1735 366(6468):eaax0868.  
1736
- 1737 Mehr S, Krasnow M, Bryant G, Hagen E. 2020. Origins of music in credible signaling. *Behav*  
1738 *Brain Sci.* 44:e60.  
1739
- 1740 Mesulam MM, Rogalski EJ, Wieneke C, Hurley RS, Geula C, Bigio EH, Thompson CK,  
1741 Weintraub S. 2014. Primary progressive aphasia and the evolving neurology of the language  
1742 network. *Nat Rev Neurol.* 10(10):554.

1743

1744 Mesulam MM, Thompson CK, Weintraub S, Rogalski EJ. 2015. The Wernicke conundrum and  
1745 the anatomy of language comprehension in primary progressive aphasia. *Brain*. 138(8):2423-  
1746 2437.

1747

1748 McDermott J. 2008. The evolution of music. *Nature*. 453(7193):287-288.

1749

1750 Mineroff Z\*, Blank I\*, Mahowald K, Fedorenko E. 2018. A robust dissociation among the  
1751 language, multiple demand, and default mode networks: evidence from inter-region correlations  
1752 in effect size. *Neuropsychologia*. 119:501-511.

1753

1754 Mollica F, Shain C, Affourtit J, Kean H, Siegelman M, Fedorenko E. 2020. Another look at the  
1755 constituent structure of sentences in the human brain [Poster presentation]. SNL 2020; October  
1756 21-24; virtual.

1757

1758 Monti MM, Parsons LM, Osherson DN. 2009. The boundaries of language and thought in  
1759 deductive inference. *Proc Natl Acad Sci USA*. 106(30):12554-12559.

1760

1761 Monti MM, Parsons LM, Osherson DN. 2012. Thought beyond language: Neural dissociation of  
1762 algebra and natural language. *Psychol Sci*. 23(8):914-922.

1763

- 1764 Morosan P, Rademacher J, Schleicher A, Amunts K, Schormann T, Zilles K. 2001. Human  
1765 primary auditory cortex: cytoarchitectonic subdivisions and mapping into a spatial reference  
1766 system. *Neuroimage*. 13(4):684-701.
- 1767
- 1768 Musso M, Weiller C, Horn A, Glauche V, Umarova R, Hennig J, Schneider A, Rijntjes M. 2015.  
1769 A single dual-stream framework for syntactic computations in music and language. *Neuroimage*.  
1770 117:267-283.
- 1771
- 1772 Nettl B. 2015. *The study of ethnomusicology: Thirty-three discussions*. Champaign (IL):  
1773 University of Illinois Press.
- 1774
- 1775 Newman AJ, Pancheva R, Ozawa K, Neville HJ, Ullman MT. 2001. An event-related fMRI  
1776 study of syntactic and semantic violations. *J Psycholinguist Res*. 30(3):339-364.
- 1777
- 1778 Ngo MK, Vu KPL, Strybel TZ. 2016. Effects of music and tonal language experience on relative  
1779 pitch performance. *Am J Psychol*. 129(2):125-134.
- 1780
- 1781 Nieto-Castañon A, Fedorenko E. 2012. Subject-specific functional localizers increase sensitivity  
1782 and functional resolution of multi-subject analyses. *Neuroimage*. 63(3):1646-1669.
- 1783
- 1784 Norman-Haignere S, Kanwisher N, McDermott JH. 2013. Cortical pitch regions in humans  
1785 respond primarily to resolved harmonics and are located in specific tonotopic regions of anterior  
1786 auditory cortex. *J Neurosci*. 33(50):19451-19469.

1787

1788 Norman-Haignere S, Kanwisher NG, McDermott JH. 2015. Distinct cortical pathways for music  
1789 and speech revealed by hypothesis-free voxel decomposition. *Neuron*. 88(6):1281-1296.

1790

1791 Norman-Haignere SV, Feather J, Boebinger D, Brunner P, Ritaccio A, McDermott JH, Schalk G,  
1792 Kanwisher N. 2022. A neural population selective for song in human auditory cortex. *Curr Biol*.  
1793 32(7):1470-1484.

1794

1795 Oldfield RC. 1971. The assessment and analysis of handedness: the Edinburgh inventory.  
1796 *Neuropsychologia*. 9(1):97-113.

1797

1798 Omigie D, Samson S. 2014. A protective effect of musical expertise on cognitive outcome  
1799 following brain damage?. *Neuropsychol Rev*. 24(4):445-460.

1800

1801 Overath T, McDermott JH, Zarate JM, Poeppel D. 2015. The cortical analysis of speech-specific  
1802 temporal structure revealed by responses to sound quilts. *Nat Neurosci*. 18(6):903-911.

1803

1804 Pallier C, Devauchelle AD, Dehaene S. 2011. Cortical representation of the constituent structure  
1805 of sentences. *Proc Natl Acad Sci USA*. 108(6):2522-2527.

1806

1807 Patel AD, Gibson E, Ratner J, Besson M, Holcomb PJ. 1998. Processing syntactic relations in  
1808 language and music: An event-related potential study. *J Cogn Neurosci*. 10(6):717-733.

1809



- 1810 Patel AD. 2003. Language, music, syntax and the brain. *Nat Neurosci.* 6(7):674-681.
- 1811
- 1812 Patel AD. 2008. Music, Language, and the Brain. Oxford (UK): Oxford University Press.
- 1813
- 1814 Patel AD, Iversen JR, Wassenaar M, Hagoort P. 2008a. Musical syntactic processing in  
1815 agrammatic Broca's aphasia. *Aphasiology.* 22(7-8):776-789.
- 1816
- 1817 Patel AD, Wong M, Foxton J, Lochy A, Peretz I. 2008b. Speech intonation perception deficits in  
1818 musical tone deafness (congenital amusia). *Music Percept.* 25(4):357-368.
- 1819
- 1820 Patel AD. 2012. Language, music, and the brain: a resource-sharing framework. In: Rebuschat P,  
1821 Rohrmeier M, Hawkins J, Cross I, editors. *Language and Music as Cognitive Systems*. Oxford  
1822 (UK): Oxford University Press. p. 204-223.
- 1823
- 1824 Patel AD, Morgan E. 2017. Exploring cognitive relations between prediction in language and  
1825 music. *Cogn Sci.* 41:303-320.
- 1826
- 1827 Patterson RD, Uppenkamp S, Johnsrude IS, Griffiths TD. 2002. The processing of temporal pitch  
1828 and melody information in auditory cortex. *Neuron.* 36(4):767-776.
- 1829
- 1830 Paunov A, Blank IA, Fedorenko E. 2019. Functionally distinct language and Theory of Mind  
1831 networks are synchronized at rest and during language comprehension. *J Neurophysiol.*  
1832 121:1244-1265.

1833

1834 Paunov AM, Blank IA, Jouravlev O, Mineroff Z, Gallée J, Fedorenko E. 2022. Differential  
1835 tracking of linguistic vs. mental state content in naturalistic stimuli by language and Theory of  
1836 Mind (ToM) brain networks. *Neurobiol Lang.* 3(3):413-440.

1837

1838 Peelle JE, Troiani V, Wingfield A, Grossman M. 2010. Neural processing during older adults'  
1839 comprehension of spoken sentences: age differences in resource allocation and connectivity.  
1840 *Cereb Cortex.* 20(4):773-782.

1841

1842 Penagos H, Melcher JR, Oxenham AJ. 2004. A neural representation of pitch salience in  
1843 nonprimary human auditory cortex revealed with functional magnetic resonance imaging. *J*  
1844 *Neurosci.* 24(30):6810-6815.

1845

1846 Peretz I. 1990. Processing of local and global musical information by unilateral brain-damaged  
1847 patients. *Brain.* 113(4):1185-1205.

1848

1849 Peretz I, Kolinsky R, Tramo M, Labrecque R, Hublet C, Demeurisse G, Belleville S. 1994.  
1850 Functional dissociations following bilateral lesions of auditory cortex. *Brain.* 117(6):1283-1301.

1851

1852 Peretz I, Belleville S, Fontaine S. 1997. Dissociations between music and language functions  
1853 after cerebral resection: a new case of amusia without aphasia. *Can J Exp Psychol* 51(4):354-368.

1854

- 1855 Peretz I, Champod AS, Hyde K. 2003. Varieties of musical disorders: the Montreal Battery of  
1856 Evaluation of Amusia. *Ann N Y Acad Sci.* 999(1):58-75.  
1857
- 1858 Peretz I, Coltheart M. 2003. Modularity of music processing. *Nat Neurosci.* 6(7):688-691.  
1859
- 1860 Peretz I, Vuvan D, Lacrois MÉ, Armony JL. 2015. Neural overlap in processing music and  
1861 speech. *Philos Trans R Soc Lond B Biol Sci.* 370(1664):20140090.  
1862
- 1863 Perrachione TK, Fedorenko EG, Vinke L, Gibson E, Dilley LC. 2013. Evidence for shared  
1864 cognitive processing of pitch in music and language. *PLoS One.* 8(8):e73372.  
1865
- 1866 Perruchet P, Poulin-Charronnat B. 2013. Challenging prior evidence for a shared syntactic  
1867 processor for language and music. *Psychon Bull Rev.* 20(2):310-317.  
1868
- 1869 Piccirilli M, Sciarra T, Luzzi S. 2000. Modularity of music: evidence from a case of pure  
1870 amusia. *J Neurol Neurosurg Psychiatry.* 69(4):541-545.  
1871
- 1872 Pinker S, Prince A. 1988. On language and connectionism: Analysis of a parallel distributed  
1873 processing model of language acquisition. *Cognition.* 28(1-2):73-193.  
1874
- 1875 Pinker S. 1991. Rules of language. *Science.* 253(5019):530-535.  
1876

- 1877   Pinker S. 1994. *The Language Instinct: How the Mind Creates Language*, New York (NY):  
1878   Harper Collins Publishers, Inc.  
1879
- 1880   Pinker S. 1999. Out of the minds of babes. *Science*. 283(5398):40-41.  
1881
- 1882   Poldrack RA. 2006. Can cognitive processes be inferred from neuroimaging data?. *Trends Cogn*  
1883   *Sci*. 10(2):59-63.  
1884
- 1885   Poldrack RA. 2011. Inferring mental states from neuroimaging data: from reverse inference to  
1886   large-scale decoding. *Neuron*. 72(5):692-697.  
1887
- 1888   Polk M, Kertesz A. 1993. Music and language in degenerative disease of the brain. *Brain Cogn*.  
1889   22(1):98-117.  
1890
- 1891   Poulin-Charronnat B, Bigand E, Madurell F, Peereman R. 2005. Musical structure modulates  
1892   semantic priming in vocal music. *Cognition*. 94:B67-B78.  
1893
- 1894   Pritchett B, Hoeflin C, Koldewyn K, Dechter E, Fedorenko E. 2018. High-level language  
1895   processing regions are not engaged in action observation or imitation. *J Neurophysiol*.  
1896   120(5):2555-2570.  
1897
- 1898   Riemann H. 1877. *Musikalische Syntaxis: Grundriss einer harmonischen Satzbildungslehre*.  
1899   Leipzig: Breitkopf und Härtel.

- 1900
- 1901 Roads C, Wieneke P. 1979. Grammars as representations for music. *Comput Music J.* 3(1):48-55.
- 1902
- 1903 Roberts I. 2012. Comments and a conjecture inspired by Fabb and Halle. In: Rebuschat P,
- 1904 Rohrmeier M, Hawkins JA, Cross I, editors. *Language and Music as Cognitive Systems*. Oxford:
- 1905 Oxford University Press. p. 51-66.
- 1906
- 1907 Röder B, Stock O, Neville H, Bien S, Rösler F. 2002. Brain activation modulated by the
- 1908 comprehension of normal and pseudo-word sentences of different processing demands: a
- 1909 functional magnetic resonance imaging study. *Neuroimage.* 15(4):1003-1014.
- 1910
- 1911 Rogalsky C, Hickok G. 2011. The role of Broca's area in sentence comprehension. *J Cogn*
- 1912 *Neurosci.* 23(7):1664-1680.
- 1913
- 1914 Rueffler C, Hermisson J, Wagner GP. 2012. Evolution of functional specialization and division
- 1915 of labor. *Proc Natl Acad Sci USA.* 109(6):E326-E335.
- 1916
- 1917 Sag I, Wasow T, Bender E. 2003. Formal syntax, an introduction. CSLI publication.
- 1918
- 1919 Sammler D, Koelsch S, Ball T, Brandt A, Elger CE, Friederici AD, Grigutsch M, Huppertz H-J,
- 1920 Knosche TR, Wellmer J, Widman G, Schulze-Bonhaged A. 2009. Overlap of musical and
- 1921 linguistic syntax processing: intracranial ERP evidence. *Ann N Y Acad Sci.* 1169(1):494-498.
- 1922

- 1923 Sammler D, Koelsch S, Friederici AD. 2011. Are left fronto-temporal brain areas a prerequisite  
1924 for normal music-syntactic processing?. *Cortex*. 47(6):659-673.  
1925
- 1926 Sammler D, Koelsch S, Ball T, Brandt A, Grigutsch M, Huppertz HJ, Wellmer J, Widman G,  
1927 Elger CE, Friederici AD, Schulze-Bonhaged A. 2013. Co-localizing linguistic and musical  
1928 syntax with intracranial EEG. *Neuroimage*. 64:134-146.  
1929
- 1930 Savage PE, Loui P, Tarr B, Schachner A, Glowacki L, Mithen S, Fitch WT. 2021. Music as a  
1931 coevolved system for social bonding. *Behav Brain Sci*. 44(e59):1-22.  
1932
- 1933 Schmidt S. 2009. Shall We Really Do It Again? The Powerful Concept of Replication Is  
1934 Neglected in the Social Sciences. *Rev Gen Psychol*. 13(2):90-100.  
1935
- 1936 Scott TL, Gallée J, Fedorenko E. 2017. A new fun and robust version of an fMRI localizer for  
1937 the frontotemporal language system. *Cogn Neurosci*. 8(3):167-176.  
1938
- 1939 Shain C\*, Blank I\*, Van Shijndel M, Schuler W, Fedorenko E. 2020. fMRI reveals language-  
1940 specific predictive coding during naturalistic sentence comprehension. *Neuropsychologia*.  
1941 138:107307.  
1942
- 1943 Shain C, Kean H, Lipkin B, Affourtit J, Siegelman M, Mollica F, Fedorenko E. 2021.  
1944 ‘Constituent length’ effects in fMRI do not provide evidence for abstract syntactic processing.  
1945 *bioRxiv*.

- 1946
- 1947 Shain C, Blank IA, Fedorenko E, Gibson E, Schuler W. 2022. Robust effects of working  
1948 memory demand during naturalistic language comprehension in language-selective cortex. *J*  
1949 *Neurosci.* 42(39):7412-7430.
- 1950
- 1951 Shashidhara S, Mitchell DJ, Erez Y, Duncan J. 2019. Progressive recruitment of the  
1952 frontoparietal multiple-demand system with increased task complexity, time pressure, and  
1953 reward. *J Cogn Neurosci.* 31(11):1617-1630.
- 1954
- 1955 Sihvonen AJ, Särkämö T, Leo V, Tervaniemi M, Altenmüller E, Soinila S. 2017. Music-based  
1956 interventions in neurological rehabilitation. *Lancet Neurol.* 16(8):648-660.
- 1957
- 1958 Slevc LR, Rosenberg JC, Patel AD. 2009. Making psycholinguistics musical: Self-paced reading  
1959 time evidence for shared processing of linguistic and musical syntax. *Psychon Bull Rev.*  
1960 16(2):374-381.
- 1961
- 1962 Slevc LR, Reitman J, Okada B. 2013. Syntax in music and language: the role of cognitive  
1963 control. In: Proceedings of the Annual Meeting of the Cognitive Science Society; 2013 Jul 31-Aug  
1964 3; Berlin, Germany; p. 3414-3419.
- 1965
- 1966 Slevc LR, Okada BM. 2015. Processing structure in language and music: a case for shared  
1967 reliance on cognitive control. *Psychon Bull Rev.* 22(3):637-652.
- 1968

- 1969 Slevc LR, Faroqi-Shah Y, Saxena S, Okada BM. 2016. Preserved processing of musical structure  
1970 in a person with agrammatic aphasia. *Neurocase*. 22(6):505-511.  
1971
- 1972 Stromswold K, Caplan D, Alpert N, Rauch S. 1996. Localization of syntactic comprehension by  
1973 positron emission tomography. *Brain Lang*. 52(3):452-473.  
1974
- 1975 Sueoka Y, Paunov A, Ivanova A, Blank IA, Fedorenko E. 2022. The language network reliably  
1976 ‘tracks’ naturalistic meaningful non-verbal stimuli. bioRxiv  
1977
- 1978 Sullivan GM, Feinn R. 2012. Using effect size—or why the P value is not enough. *J Grad Med*  
1979 *Educ*. 4(3):279-282.  
1980
- 1981 Sundberg J, Lindblom B. 1976. Generative theories in language and music descriptions.  
1982 *Cognition*. 4(1):99-122.  
1983
- 1984 Swain JP. 1995. The concept of musical syntax. *Music Q*. 79(2):281-308.  
1985
- 1986 Tahmasebi AM, Davis MH, Wild CJ, Rodd JM, Hakyemez H, Abolmaesumi P, Johnsrude IS.  
1987 2012. Is the link between anatomical structure and function equally strong at all cognitive levels  
1988 of processing?. *Cereb Cortex*. 22(7):1593-1603.  
1989
- 1990 Tarantola A. 2005. *Inverse problem theory and methods for model parameter estimation*.  
1991 Philadelphia (PA): Society for Industrial and Applied Mathematics.



- 1992
- 1993 Temperley D. 2022. Music and Language. *Annu Rev Linguist.* 8:153-170.
- 1994
- 1995 te Rietmolen NA, Mercier M, Trebuchon A, Morillon B, Schon D. 2022. Speech and music
- 1996 recruit frequency-specific distributed and overlapping cortical networks. *bioRxiv*.
- 1997
- 1998 Tillmann B, Janata P, Bharucha JJ. 2003. Activation of the inferior frontal cortex in musical
- 1999 priming. *Cogn Brain Res.* 16(2):145-161.
- 2000
- 2001 Tillmann B, Koelsch S, Escoffier N, Bigand E, Lalitte P, Friederici AD, von Cramon DY. 2006.
- 2002 Cognitive priming in sung and instrumental music: activation of inferior frontal cortex.
- 2003 *Neuroimage.* 31(4):1771-1782.
- 2004
- 2005 Tillmann B. 2012. Music and Language Perception: Expectations, Structural Integration, and
- 2006 Cognitive Sequencing. *Top Cogn Sci.* 4(4):568-584.
- 2007
- 2008 Trehub SE. 2003. The developmental origins of musicality. *Nat Neurosci.* 6(7):669-673.
- 2009
- 2010 Tyler LK, Marslen-Wilson WD, Randall B, Wright P, Devereux BJ, Zhuang J, Papoutsis M,
- 2011 Stamatakis EA. 2011. Left inferior frontal cortex and syntax: function, structure and behaviour in
- 2012 patients with left hemisphere damage. *Brain.* 134(2):415-431.
- 2013

- 2014 Van de Cavey J, Hartsuiker RJ. 2016. Is there a domain-general cognitive structuring system?  
2015 Evidence from structural priming across music, math, action descriptions, and language.  
2016 *Cognition*. 146:172-184.
- 2017
- 2018 Varley R, Siegal M. 2000. Evidence for cognition without grammar from causal reasoning and  
2019 ‘theory of mind’ in an agrammatic aphasic patient. *Curr Biol*. 10(12):723-726.
- 2020
- 2021 Varley RA, Klessinger NJ, Romanowski CA, Siegal M. 2005. Agrammatic but numerate. *Proc*  
2022 *Natl Acad Sci USA*. 102(9):3519-3524.
- 2023
- 2024 Vázquez-Rodríguez B, Suárez LE, Markello RD, Shafiei G, Paquola C, Hagmann P, van den  
2025 Heuvel MP, Bernhardt BC, Spreng RN, Masic B. 2019. Gradients of structure–function tethering  
2026 across neocortex. *Proc Natl Acad Sci USA*. 116(42):21219-21227.
- 2027
- 2028 Vuust P, Heggli OA, Friston KJ, Kringelbach ML. 2022. Music in the brain. *Nat Rev Neurosci*.  
2029 23(5):287-305.
- 2030
- 2031 Wehbe L, Blank I, Shain C, Futrell R, Levy R, Malsburg T, Smith N, Gibson E, Fedorenko E.  
2032 2021. Incremental language comprehension difficulty predicts activity in the language network  
2033 but not the multiple demand network. *Cereb Cortex*. 31(9):4006-4023.
- 2034
- 2035 Westfall J, Kenny DA, Judd CM. 2014. Statistical power and optimal design in experiments in  
2036 which samples of participants respond to samples of stimuli. *J Exp Psychol*. 143(5):2020-2045.

2037

2038 Willems RM, Van der Haegen L, Fisher SE, Francks C. 2014. On the other hand: including left-

2039 handers in cognitive neuroscience and neurogenetics. *Nat Rev Neurosci.* 15(3):193-201.

2040

2041 Wilson SM, Saygin AP. 2004. Grammaticality judgment in aphasia: Deficits are not specific to

2042 syntactic structures, aphasic syndromes, or lesion sites. *J Cogn Neurosci.* 16(2):238-252.

2043

2044 Wilson SM, Galantucci S, Tartaglia MC, Gorno-Tempini ML. 2012. The neural basis of

2045 syntactic deficits in primary progressive aphasia. *Brain Lang.* 122(3):190-198.

2046

2047 Wong PC, Perrachione TK. 2007. Learning pitch patterns in lexical identification by native

2048 English-speaking adults. *Appl Psycholinguist.* 28(4):565-585.

2049

2050 Woolgar A, Duncan J, Manes F, Fedorenko E. 2018. Fluid intelligence is supported by the

2051 multiple-demand system not the language system. *Nat Hum Behav.* 2(3):200-204.

2052

2053 Zatorre RJ. 1984. Musical perception and cerebral function: A critical review. *Music Percept.*

2054 2(2):196-221.
